24

25 **Short title:** Identification of a B<sub>12</sub> uptake protein in algae

26

27 **One sentence summary:** Knockout mutants and physiological studies demonstrate that the CBA1  
28 protein is essential for uptake of vitamin B<sub>12</sub> in both *Chlamydomonas reinhardtii* and the unrelated  
29 *Phaeodactylum tricornutum*.

30

31 **Keywords:** cobalamin, *Chlamydomonas reinhardtii*, *Phaeodactylum tricornutum*, insertional  
32 mutagenesis, CLiP mutants, CRISPR-Cas9, riboswitch

33

34 **Manuscript length:** 7241 words

35 **Abstract**

36

37 Microalgae play an essential role in global net primary productivity and global biogeochemical  
38 cycling, but despite their phototrophic lifestyle, over half of algal species depend on a supply of the  
39 corrinoid vitamin B<sub>12</sub> (cobalamin) for growth. This essential organic micronutrient is produced only  
40 by a subset of prokaryotic organisms, which implies that for algal species to use this compound, they  
41 must first acquire it from external sources. Previous studies have identified protein components  
42 involved in vitamin B<sub>12</sub> uptake in bacterial species and humans. However, little is known about how it  
43 is taken up in algae. Here, we demonstrate the essential role of a protein, CBA1 (for cobalamin  
44 acquisition protein 1), in B<sub>12</sub> uptake in *Phaeodactylum tricornutum*, using CRISPR-Cas9 to generate  
45 targeted knockouts, and in *Chlamydomonas reinhardtii*, by insertional mutagenesis. In both cases,  
46 CBA1 knockout lines are no longer able to take up exogenous vitamin B<sub>12</sub>. Complementation of the  
47 *C. reinhardtii* mutants with the wildtype *CBA1* gene restores B<sub>12</sub> uptake, and regulation of *CBA1*  
48 expression via a riboswitch element can be used to control the phenotype. When visualised by  
49 confocal microscopy, a YFP-fusion with *C. reinhardtii* CBA1 shows association with membranes. A  
50 bioinformatics analysis found that CBA1-like sequences are present in all the major eukaryotic phyla.  
51 Its presence is correlated with B<sub>12</sub>-dependent enzymes in many, although not all, taxa, suggesting  
52 CBA1 has a conserved role. Our results thus provide insight into the molecular basis of algal B<sub>12</sub>  
53 acquisition, a process that likely underpins many interactions in aquatic microbial communities.

54

55

## 56 INTRODUCTION

57

58 Microalgae are a diverse group of eukaryotic organisms that thrive in all aquatic environments. They  
59 form the basis of most aquatic food chains and are major contributors to global primary productivity,  
60 with marine microalgae responsible for an estimated 30% of total carbon fixation (Field et al., 1998).  
61 Understanding the drivers that support algal growth is thus of considerable ecological importance.  
62 Despite their photoautotrophic lifestyle, a widespread trait in algae is dependence on an external  
63 source of an organic micronutrient, vitamin B<sub>12</sub> (cobalamin), a complex cobalt-containing corrinoid  
64 molecule. Approximately half of algal species surveyed across the eukaryotic tree of life require B<sub>12</sub>  
65 for growth (Croft et al., 2005). However, the proportion of B<sub>12</sub>-dependent species differs between  
66 algal groups, from 30% (n=148) of Chlorophytes to 96% (n=27) of algal species that participate in  
67 harmful algal blooms (Tang et al., 2010). Within algal lineages, there is no evidence that any can  
68 produce B<sub>12</sub> *de novo*, so this auxotrophy is not due to loss of one or more biosynthetic genes. Rather,  
69 the requirement for B<sub>12</sub> stems from the fact that it is an essential cofactor for methionine synthase  
70 (METH), and species that can grow without supplementation have an alternative, B<sub>12</sub>-independent,  
71 isoform of this enzyme called METE (Croft et al., 2005; Helliwell et al., 2011). Many microalgae,  
72 including the green alga *Chlamydomonas reinhardtii* and the unrelated diatom *Phaeodactylum*  
73 *tricornutum*, encode both forms of methionine synthase and utilise METE in the absence of  
74 exogenous B<sub>12</sub>, but take up and utilise the compound if it becomes available (Helliwell et al., 2011).  
75 Under those conditions, the expression of *METE*, which has been found to have a lower catalytic rate  
76 than *METH* (Gonzalez et al. 1992), is repressed, and cells rely on *METH* activity.

77

78 The biosynthetic pathway for B<sub>12</sub> is confined to prokaryotes (Warren et al., 2002) and indeed only a  
79 subset of bacteria encode the entire set of 20 or so enzymes required to synthesise corrinoids from the  
80 common tetrapyrrole precursor (Shelton et al., 2019), with many eubacterial species also reliant on an  
81 external source. In some cases, this is due to the loss of one or a few enzymes of the biosynthetic  
82 pathway, but in many bacteria the pathway is absent altogether and auxotrophy is the consequence of  
83 relying on one or more B<sub>12</sub>-dependent enzymes, such as *METH*. In microalgae, supplementation of  
84 cultures of *P. tricornutum* with B<sub>12</sub> increases its growth rate subtly (Bertrand et al., 2012) and in *C.*

85 *reinhardtii* use of METH confers thermal tolerance (Xie et al., 2013). More direct evidence for a  
86 selective advantage is demonstrated by the fact that an experimentally-evolved *metE* mutant of *C.*  
87 *reinhardtii* predominates in mixed populations with wild-type cells over tens of cell generations, as  
88 long as B<sub>12</sub> is included in the medium (Helliwell et al., 2015). This is despite the fact that in the  
89 absence of B<sub>12</sub>, the *metE* mutant is non-viable within a few days (Bunbury et al., 2020).

90

91 The minimum levels of B<sub>12</sub> in the medium needed to support growth of laboratory cultures of algal  
92 B<sub>12</sub>-auxotrophs are in the range of 10-50 pM (Croft et al., 2005), whereas B<sub>12</sub> concentrations have  
93 been reported to be just 5-13 pM in freshwater systems (Ohwada, 1973). A similar value of 6.2 pM is  
94 the average value in most marine environments, although up to 87 pM could be detected in some  
95 coastal waters (Sañudo-Wilhelmy et al., 2014), which may be linked to the higher cobalt  
96 concentrations measured there (Panzeca et al., 2009). Given the limiting levels of B<sub>12</sub> in the  
97 environment, its relatively short half-life (in the order of days) in surface water (Carlucci et al., 2007;  
98 Sañudo-Wilhelmy et al., 2014), and that as a large polar molecule it is unlikely to simply diffuse  
99 across cellular membranes, it is clear that algae must have an efficient means to take up B<sub>12</sub>. In  
100 bacteria, the molecular mechanisms for B<sub>12</sub> uptake have been extensively characterised. The B<sub>12</sub>  
101 transport and utilisation (*btu*) operon is perhaps the best known (Kadner, 1990), comprising BtuB, a  
102 TonB-dependent transporter in the outer membrane, a B<sub>12</sub>-binding protein, BtuF, located in the  
103 periplasm, and BtuC and BtuD, components of an ATP-binding cassette (ABC) transporter that sits in  
104 the inner membrane (Borths et al., 2002). In mammals, dietary B<sub>12</sub> is bound to intrinsic factor in the  
105 ileum and taken up from the gut via receptor-mediated endocytosis (Nielsen et al., 2012). It is then  
106 transported between and within cells via multiple B<sub>12</sub> transport proteins (Banerjee et al., 2021; Choi  
107 and Ford, 2021). These include LMBD1/ABCD4, the latter being an integral membrane ABC  
108 transporter in the lysosomal membrane of gut epithelial cells, which facilitates delivery of B<sub>12</sub> into the  
109 cytosol, and MRP1 (or ABCC1), another ABC transporter that has sequence similarity to BtuCD and  
110 is involved in export of free B<sub>12</sub> into the plasma where it binds to the main B<sub>12</sub> transport protein,  
111 transcobalamin (Beedholm-Ebsen et al., 2010). Mice *mrp1* mutants were still able to transport a small  
112 amount of cobalamin out of cells, indicating redundant mechanisms for this function that have not yet

113 been identified. Cobalamin circulating in the plasma bound to transcobalamin can then be taken up by  
114 other cells via receptor-mediated endocytosis (Nielsen et al., 2012).

115

116 In contrast to these well-studied processes in bacteria and mammals, the understanding of B<sub>12</sub>  
117 acquisition in microalgae is more limited. A survey of microalgal species, including marine and  
118 freshwater taxa and those that require B<sub>12</sub> (for example *Euglena gracilis*, *Thalassiosira pseudonana*)  
119 and non-requireers (such as *P. tricornutum*, *Dunaliella primolecta*), found that many released a ‘B<sub>12</sub>-  
120 binder’ into the medium, likely a protein, that appeared to sequester B<sub>12</sub> from solution and thereby  
121 inhibited growth of B<sub>12</sub>-dependent algae (Pintner and Altmeyer, 1979). Its role was unknown, but it  
122 was postulated that it might be involved in competition for resources between microalgal species in  
123 the environment. Subsequently, a protein was purified from the medium of cultures of *T. pseudonana*  
124 with a high affinity binding constant of 2 pM for B<sub>12</sub> (Sahni et al., 2001). In its native state it was an  
125 oligomer of >400 kDa, with subunits of ~80 kDa and the amino acid profile was determined, but it  
126 was not possible to obtain sufficient amounts to characterise further. A different approach was taken  
127 by Bertrand et al. (2012), who conducted a transcriptomics and proteomics study of *P. tricornutum*  
128 and *T. pseudonana* grown under low or sufficient B<sub>12</sub> conditions. This led to the identification of a  
129 gene highly upregulated at the transcript and protein level in the absence of B<sub>12</sub>. Overexpression of  
130 this protein in *P. tricornutum* resulted in an increase in the rate of B<sub>12</sub> uptake, and the protein was  
131 named CoBalamin Acquisition protein 1 (CBA1) although no direct role was established. In this study  
132 we have taken a mutagenesis approach to try to identify genes responsible for B<sub>12</sub> uptake in both *P.*  
133 *tricornutum* and *C. reinhardtii*, including extending the work on CBA1. In addition, we have  
134 determined the extent to which candidate proteins are conserved throughout the algal lineages,  
135 making use of recent increases in algal sequencing data.

136 **RESULTS**

137

138 ***P. tricornutum* CBA1 knockout lines do not take up B<sub>12</sub>**

139 Previous work showed that overexpression of CBA1 in *P. tricornutum* conferred enhanced B<sub>12</sub> uptake  
140 rates (Bertrand et al., 2012) but the study did not demonstrate whether it was essential for this process.  
141 To address this question, *CBA1* knockout lines were generated in *P. tricornutum* strain 1055/1 (Table  
142 S1) by CRISPR-Cas9 editing, using a homologous recombination repair template that included a  
143 nourseothricin resistance (*NAT*) cassette (Figure 1a). CRISPR-Cas9 lines were cultured on selective  
144 media and screened for the absence of WT alleles at the *PtCBA1* locus (Phatr3\_J48322) using PCR  
145 (Figure 1b). When the *PtCBA1* gene was amplified (top panel, Figure 1b) from  $\Delta$ CBA1-1 with  
146 primers flanking the homologous recombination regions, two bands were detected; the larger of these  
147 corresponded to the WT amplicon, whilst the smaller band corresponded to a replacement of *CBA1* by  
148 *NAT*, suggesting that this strain is a mono-allelic knockout. For  $\Delta$ CBA1-2, the *PtCBA1* gene primers  
149 amplified a single smaller product, suggesting that this was a bi-allelic knockout, whereas the *PtCBA1*  
150 ORF primers (bottom panel of Figure 1b) did not amplify anything, indicating a disruption  
151 specifically in this region. Similarly, no band was detected with primers that amplify across the 5' end  
152 of the *NAT* knock-in (HR primers), which might indicate further disruptions upstream of the 5'HR  
153 region of  $\Delta$ CBA1-2. Although a larger band than for WT was amplified in  $\Delta$ CBA1-3 using the  
154 *PtCBA1* gene primers, those for the *PtCBA1* ORF amplified a smaller product; in both cases a single  
155 band was observed indicating a bi-allelic deletion at the sgRNA target sites.

156

157 To test whether the  $\Delta$ CBA1 lines were affected in their ability to take up vitamin B<sub>12</sub> we developed a  
158 standardised B<sub>12</sub>-uptake assay, detailed in Materials and Methods. In brief, algal cells were grown to  
159 the same growth stage and adjusted to the same cell density, then incubated in media containing a  
160 known amount of cyanocobalamin for one hour. Thereafter, cells were pelleted by centrifugation and  
161 the amount of B<sub>12</sub> determined in the cell pellet and the media fraction using a *Salmonella typhimurium*  
162 bioassay (Bunbury et al., 2020). For each sample, the B<sub>12</sub> measured in the cellular and media fractions  
163 were added to provide an estimated 'Total' and compared to the amount of B<sub>12</sub> added initially (Figure

164 1c, dashed line), to determine the extent of recovery. For the WT strain, most of the added B<sub>12</sub> was  
165 found in the cellular fraction. The mono-allelic knockout line  $\Delta$ CBA1-1 consistently showed ~20-  
166 30% B<sub>12</sub> uptake relative to the WT strain. This suggested that a single copy of *PtCBA1* is sufficient to  
167 confer B<sub>12</sub> uptake in *P. tricornutum*, but not to the same extent as the WT strain. In contrast, for the  
168 two bi-allelic knockout lines ( $\Delta$ CBA1-2 and  $\Delta$ CBA1-3) no B<sub>12</sub> was detected in the cellular fraction in  
169 any experiment, indicating that vitamin B<sub>12</sub> uptake was fully impaired in the absence of a functional  
170 *PtCBA1* copy, at least at the limit of detection of the B<sub>12</sub> bioassay (of the order of 10 pg). These  
171 results expand our understanding of *PtCBA1* by demonstrating that its presence is essential for B<sub>12</sub>  
172 uptake and indicates that there is no functional redundancy to *PtCBA1*.

173

#### 174 **Insertional mutagenesis identified the *C. reinhardtii* homologue of *CBA1***

175 Bertrand et al. (2012) reported that there were no detectable *CBA1* homologues in algal lineages  
176 outside the Stramenopiles, so to investigate B<sub>12</sub> uptake in *C. reinhardtii*, we decided to take an  
177 insertional mutagenesis approach. We took advantage of the fact that B<sub>12</sub> represses expression of the  
178 *METE* gene at the transcriptional level via the promoter ( $P_{METE}$ ), and that reporter genes driven by this  
179 genetic element respond similarly (Helliwell et al., 2014), to develop a highly sensitive screen for  
180 lines no longer able to respond to B<sub>12</sub>. We hypothesised that, since  $P_{METE}$  is likely to respond  
181 specifically to intracellular B<sub>12</sub>,  $P_{METE}$  would not be repressed in strains unable to take up B<sub>12</sub> from the  
182 media, so the reporter would be expressed and functional. If the reporter were an antibiotic resistance  
183 gene, this would allow identification of B<sub>12</sub> uptake mutants in a more high-throughput manner than  
184 the B<sub>12</sub>-uptake assay. The background strain for insertional mutagenesis was made by transforming *C.*  
185 *reinhardtii* strain UVM4 (Neupert et al., 2009) with plasmid pAS\_R1 containing a paromomycin  
186 resistance gene (*aphVIII*) under control of  $P_{METE}$  (Figure 2a, top construct). Lines of this strain were  
187 tested for their responsiveness to B<sub>12</sub> and paromomycin. One line, UVM4-T12, showed the  
188 appropriate sensitivity with increasing repression of growth in paromomycin as B<sub>12</sub> concentrations  
189 were increased, the effect being more marked at 15-20  $\mu\text{g}\cdot\text{ml}^{-1}$  paromomycin than at 5-10  $\mu\text{g}\cdot\text{ml}^{-1}$   
190 (Figure 2b). This line thus allowed for an easily quantifiable growth phenotype that was  
191 proportionally related to B<sub>12</sub> concentration.



192

193 Insertional mutagenesis was carried out by transforming UVM4-T12 with a plasmid (pHyg3)  
194 containing a hygromycin resistance gene (*aphVII*) under the control of the constitutively expressed  
195  $\beta$ 2-tubulin promoter (Figure 2a, bottom construct), generating a population of UVM4-T12::pHyg3  
196 lines with the cassette randomly inserted into the nuclear genome. By plating the products of the  
197 transformation on solid TAP media supplemented with a range of paromomycin, hygromycin and  
198 vitamin B<sub>12</sub> concentrations (see Methods), 7 colonies were obtained. This was estimated to be from  
199 approximately 5000 primary transformants, determined by plating the same volume on TAP plates  
200 with the antibiotics but without B<sub>12</sub>. These 7 putative insertional mutant (IM) lines were then assessed  
201 for their ability to take up B<sub>12</sub> using the B<sub>12</sub> uptake assay. For UVM4, UVM4-T12 and insertional  
202 lines from the plate without B<sub>12</sub> (labelled Control 1-3), similar amounts of B<sub>12</sub> were recovered from  
203 the cellular and media fractions (Figure S1). This was also the case for 6 of the IM lines, suggesting  
204 that they could still take up B<sub>12</sub> and were likely false positives of the initial screen. However, no B<sub>12</sub>  
205 could be detected in the cellular fraction of UVM4-T12::pHyg3 #IM4 (hereafter referred to as IM4),  
206 indicating that this mutant line did not take up B<sub>12</sub>.

207

208 To obtain independent corroboration that IM4 was impaired in B<sub>12</sub> uptake, cells of this mutagenized  
209 line were incubated with a fluorescently-labelled B<sub>12</sub> derivative, B<sub>12</sub>-BODIPY (Lawrence et al., 2018),  
210 and then imaged using confocal microscopy. *C. reinhardtii* cells were incubated in TAP medium  
211 without B<sub>12</sub>-BODIPY or with 1  $\mu$ M B<sub>12</sub>-BODIPY for 1 hour, washed with fresh media and  
212 subsequently imaged. There was no signal detected in the channel used for B<sub>12</sub>-BODIPY (589 nm  
213 excitation; 607-620 nm detection) in samples without B<sub>12</sub>-BODIPY added (Figure S2, top two rows),  
214 indicating that the imaging protocol was specific to this compound. When B<sub>12</sub>-BODIPY was added,  
215 UVM4-T12 showed the B<sub>12</sub>-BODIPY signal located within the algal cell (Figure S2, third row),  
216 indicating that this signal could be effectively detected by the imaging protocol and that B<sub>12</sub>-BODIPY  
217 was being transported into the cells. In contrast, there was no B<sub>12</sub>-BODIPY signal in IM4 cells,  
218 supporting the hypothesis that B<sub>12</sub> uptake was impaired in this mutant (Figure S2, bottom row). In  
219 addition, the response of the *METE* gene to B<sub>12</sub> in IM4 was assessed by RT-qPCR. UVM4 and IM4

220 cultures were grown in media with or without addition of B<sub>12</sub> for 4 days in continuous light, after  
221 which the cultures were harvested for RNA extraction and cDNA synthesis. As expected, *METE* was  
222 repressed in UVM4 in the presence of B<sub>12</sub> compared to no supplementation (Figure 3a), whereas IM4  
223 showed similar *METE* expression in both conditions. This provided further support for disrupted B<sub>12</sub>  
224 uptake in this line.

225

226 To identify the genomic location of the causal mutation in IM4, short-read whole genome sequencing  
227 was performed on DNA samples from UVM4, UVM4-T12 and IM4. The location of the pHyg3  
228 cassette in IM4 was identified as described in Methods and found to have disrupted the  
229 *Cre12.g508644* locus (Figure S3a), an unannotated gene. To corroborate that disruption of the  
230 *Cre12.g508644* was responsible for the uptake-phenotype, two independent mutant lines of the gene  
231 (LMJ-119922 and LMJ-042227) were ordered from the Chlamydomonas library project (CLiP)  
232 collection (Li et al., 2016) and verified to be disrupted at this locus by PCR (Figure S3a). However,  
233 when these knockout lines were tested for the ability to take up B<sub>12</sub> using the B<sub>12</sub> uptake assay, they  
234 were both found to be able to do so to a similar extent as their parental strain, cw15 (Figure S3b). This  
235 suggested that *Cre12.g508644* did not encode a protein essential for B<sub>12</sub> uptake.

236

237 We therefore examined the genome sequence data more closely to determine the genetic cause for the  
238 B<sub>12</sub>-uptake phenotype of IM4. We had identified putative homologues of human proteins involved in  
239 receptor-mediated endocytosis of B<sub>12</sub>, such as ABCD4, LMBD1 (Rutsch et al., 2009; Coelho et al.,  
240 2012) and MRP1 (Beedholm-Ebsen et al., 2010), in the *C. reinhardtii* genome by BLAST (data not  
241 shown). However, given the widespread percentage of SNPs in the IM4 genome compared to UVM4,  
242 it was not possible to identify any candidate causal mutations with confidence. Instead, manual  
243 inspection of the DNA sequencing reads mapped to the reference strain revealed one locus,  
244 *Cre02.g081050*, annotated as flagella-associated protein 24 (FAP24), where there was a unique  
245 discontinuity, suggesting that there was an insertion at exon 2 in IM4 (Figure 3b; Figure S4a). The  
246 sequence was bordered by a genome duplication of 8 bp (shown in blue in Figure S4a) and exhibited  
247 imperfect inverted repeats at the terminal regions (TIRs), indicative of a transposable element. Reads

248 could not be assembled across the discontinuity to obtain the complete sequence of the insertion, but  
249 using the left and right junction sequences as queries, three regions encoding two very similar genes  
250 were identified (Figure S4b).

251

252 Remarkably, when the *Cre02.g081050* protein was used as a query in a BLAST search, one of the hits  
253 recovered was the *PtCBA1* protein (22.9% sequence identity), even though the reciprocal sequence  
254 search had not picked up the *C. reinhardtii* gene (Bertrand et al., 2012). The Phyre2 structural  
255 prediction server (Kelley et al., 2015) was used to model the 3D structures of PtCBA1 and the *C.*  
256 *reinhartii* protein encoded by *Cre02.g081050* (Figure S5). The modelled proteins showed a high  
257 degree of structural similarity to one another (root mean squared deviation (RMSD) = 2.333),  
258 particularly with respect to the arrangement of alpha helices and lower cleft. Due to the sequence  
259 similarity and predicted structural similarity, these proteins appeared to be homologous to one another  
260 and *Cre02.g081050* is hereafter referred to as CrCBA1.

261

262 To determine whether disruption of *CrCBA1* in IM4 was responsible for the impaired B<sub>12</sub> uptake, we  
263 investigated whether it was possible to restore its ability to take up B<sub>12</sub> by transforming IM4 with the  
264 wild-type *CrCBA1*. Construct pAS\_C2 was designed with the *CrCBA1* promoter, *CrCBA1* open  
265 reading frame (ORF) and terminator and included a 3' mVenus tag attached by a poly-glycine linker  
266 (Figure 3c). IM4 was transformed with pAS\_C2, and resulting lines were tested for the ability to take  
267 up B<sub>12</sub> using the B<sub>12</sub> uptake assay. As observed previously, UVM4 was able to take up B<sub>12</sub> whilst IM4  
268 was unable to do so (Figure 3d). The CBA1 complementation line IM4::pAS\_C2 showed B<sub>12</sub> in the  
269 cellular fraction at similar levels as in UVM4, thereby indicating that the mutant phenotype had been  
270 complemented.

271

### 272 ***CrCBA1* CLiP mutant is unable to take up B<sub>12</sub> and is complemented by the WT *CrCBA1* gene**

273 Given the many genetic changes in line IM4 compared to the parental UVM4-T12 strain caused by  
274 the mutagenesis, it was essential to have independent corroboration that mutation of *CrCBA1* caused  
275 the inability to take up B<sub>12</sub>. Accordingly, we obtained two further CLiP mutants (LMJ-135929 and

276 LMJ-040682) with disruptions in intron 2 and introns 6/7 respectively of *CrCBA1* (Figure S6a) and  
277 assessed them for their ability to take up B<sub>12</sub> (Figure S6b). No B<sub>12</sub> was detected in cells of LMJ-  
278 040682, indicating complete inhibition of B<sub>12</sub> uptake. Although LMJ-135929 cells accumulated some  
279 B<sub>12</sub>, this was less than half the amount of its parent strain cw15, suggesting partial impairment in  
280 uptake, similar to the phenotype of the monoallelic *PtCBA1* knockout line (Figure 1c). However,  
281 heterozygosity cannot be the explanation for *C. reinhardtii*, which is haploid, and instead indicates  
282 that LMJ-135929 was likely to have just partial knockdown of the gene, probably because the  
283 insertion is in an intron.

284

285 Nonetheless, to provide further confirmation that mutations in *CrCBA1* were responsible for the  
286 observed impaired B<sub>12</sub> uptake, we again tested whether the phenotype could be complemented with  
287 the wild-type *CrCBA1* gene using both plasmid pAS\_C2 (Figure 3b) and an additional construct  
288 pAS\_C3 (Figure 4a), in which expression of *CrCBA1* can be controlled by a thiamine pyrophosphate  
289 (TPP) repressible riboswitch, RS<sub>THI4\_4N</sub> (Mehrshahi et al., 2020). In the absence of thiamine  
290 supplementation of the cultures, the riboswitch is not active and the gene containing it is transcribed  
291 and translated as normal; with thiamine addition, alternative splice sites are utilised, leading to  
292 inclusion of an upstream ORF containing a stop codon in the mRNA, preventing translation from the  
293 downstream start codon. LMJ-040682 was transformed with both pAS\_C2 and pAS\_C3, and  
294 representative transformant lines selected via antibiotic resistance were obtained. These, together with  
295 their parental strains were grown in the presence or absence of 10 μM thiamine for 5 days, and then  
296 used in the B<sub>12</sub> uptake assay. Transformants of both LMJ-040682::pAS\_C2 and LMJ-  
297 040682::pAS\_C3 were found to take up B<sub>12</sub> to a similar extent as their parental strain cw15 when  
298 grown in the absence of thiamine (Figure 4b). However, when 10 μM thiamine was included in the  
299 culture medium, LMJ-040682::pAS\_C3 showed virtually no B<sub>12</sub> uptake. This riboswitch-mediated  
300 conditional complementation of the phenotype in LMJ-040682::pAS\_C3 demonstrated conclusively  
301 that B<sub>12</sub> uptake in *C. reinhardtii* is dependent on the presence of CrCBA1.

302 **CrCBA1 shows an association with membranes and is highly upregulated under B<sub>12</sub>-deprivation**

303 To investigate the subcellular location of CrCBA1, we used several bioinformatic targeting prediction  
304 tools. CrCBA1 is annotated as a flagella-associated protein in the Phytozome v5.6 *C. reinhardtii*  
305 annotation. However, both DeepLoc (Almagro Armenteros et al., 2017) and SignalP (Almagro  
306 Armenteros et al., 2019) indicated a hydrophobic sequence with the characteristics of a signal peptide  
307 at the N-terminus of CrCBA1 and predicted it would be targeted to the endoplasmic reticulum (ER).  
308 Additionally, it was predicted to contain a transmembrane helix at its C-terminus by InterPro  
309 (Mitchell et al., 2019).

310

311 We next investigated the subcellular location of CrCBA1 *in vivo* by imaging two lines of LMJ-  
312 040682::pAS\_C2, where the CBA1 is tagged with mVenus, with confocal microscopy. No mVenus  
313 was detected in the parental LMJ-040682 cells, whereas a clear fluorescent signal was observed in  
314 LMJ-040682::pAS\_C2 #A10 and LMJ-040682::pAS\_C2 #D10 (Figure 5). In these complemented  
315 lines, the mVenus signal was absent from the chloroplast, nucleus and flagella, but instead could be  
316 seen within the cell localising both to the plasma membrane and to regions that may be  
317 endomembranes such as the ER. This is consistent with findings from *P. tricornutum* showing a  
318 similar distribution (Bertrand et al., 2012). Together these data indicate that CBA1 is likely to be  
319 associated with membranes, and therefore, may have a conserved role in the B<sub>12</sub> uptake process.

320

321 Further evidence for the role of CBA1 in B<sub>12</sub> uptake was obtained by taking advantage of a B<sub>12</sub>-  
322 dependent mutant of *C. reinhardtii*, metE7 (Helliwell et al., 2015; Bunbury et al., 2020). We tested  
323 the effect of B<sub>12</sub>-deprivation over time on the expression of the *CrCBA1* gene by RT-qPCR in the  
324 mutant and determined the rate of B<sub>12</sub> uptake over a similar period. Within 6h of B<sub>12</sub> removal, there  
325 was a ~250-fold induction of the *CrCBA1* transcript, followed by a slow decline over the next 60h  
326 (Figure 6a). After resupply of B<sub>12</sub> there was then a rapid ~100-fold decline within 8h. The B<sub>12</sub> uptake  
327 capacity of metE7 followed a similar profile, increasing 3-fold over the first 12 hours of B<sub>12</sub> depletion,  
328 from ~6.5 x 10<sup>5</sup> molecules B<sub>12</sub>/cell/hour to 1.86 x 10<sup>6</sup> molecules B<sub>12</sub>/cell/hour (Figure 6b), then  
329 declining slowly. This induction profile is characteristic of a nutrient-starvation response shown by

330 many transporters, including in *C. reinhardtii* those for Fe (Allen et al., 2007), and for *CBA1* in the  
331 B<sub>12</sub>-dependent diatom, *Thalassiosira pseudonana* (Bertrand et al., 2012).

332

### 333 **Widespread distribution of CBA1 in algae**

334 Having shown the importance of *PtCBA1* and *CrCBA1* for B<sub>12</sub> uptake in their respective species, we  
335 re-examined how prevalent CBA1-like proteins are in Nature. Searches with BLASTP using *PtCBA1*  
336 resulted in no significant homologues in species outside the Stramenopiles (Bertrand et al., 2012).  
337 Instead, we created a hidden Markov model (HMM), using the *C. reinhardtii* CBA1 amino acid  
338 sequence and CBA1 sequences from *P. tricornutum*, *T. pseudonana*, *Fragilariopsis cylindrus*,  
339 *Aureococcus anophagefferens* and *Ectocarpus siliculosus* (Bertrand et al., 2012), to identify more  
340 accurately CBA1-like proteins in other organisms. The EukProt database of curated eukaryotic  
341 genomes (Richter et al. 2022) includes representatives from the Archaeplastida (designated by  
342 EukProt as Chloroplastida), which encompass green algae, red algae, glaucophytes and all land plants,  
343 as well as phyla that include algae with complex plastids, namely Stramenopiles (which include  
344 diatoms), Alveolata (including dinoflagellates), Rhizaria and Haptophyta, and the animals (both  
345 Metazoa and basal Choanoflagellates), the fungi and Amoebozoa. This database was queried with the  
346 CBA1 HMM model, using a cutoff e-value of 1e-20, and 277 hits were obtained (Figure S7;  
347 Supplementary Table S3). No candidates were found in the Metazoa, but CBA1 homologues were  
348 identified in all other phyla, including all photosynthetic groups, fungi and amoebozoa and in  
349 choanoflagellates, unicellular and colonial flagellated organisms considered to be the closest living  
350 relatives of animals (King et al., 2008).

351

352 Given that higher plants have no B<sub>12</sub>-dependent enzymes, the presence of a putative B<sub>12</sub>-binding  
353 protein in several angiosperms, both monocot and dicot, and the gymnosperm *Ginkgo biloba*, was  
354 somewhat surprising. To address this conundrum, we investigated to what extent CBA1 was  
355 associated with vitamin B<sub>12</sub> dependence by determining the distribution of the different isoforms of  
356 methionine synthase, METH and METE. Using the same HMM approach as before, the protein  
357 sequences were searched against the EukProt database and the combination of presence and absence

358 of CBA1, METH and METE across eukaryotic species groups was compiled (Figure 7;  
359 Supplementary Table S4). What is immediately apparent is that the combination of the three proteins  
360 is quite different in the various lineages. In the major algal groups, the Chlorophyta and the SAR  
361 clade (Stramenopiles, Alveolata and Rhizaria), METH sequences were found in the majority of  
362 genomes analysed and their presence was correlated with CBA1. In the genomes of the Chlorophyta  
363 and the SAR clade that encoded METE only (7 taxa in total), CBA1 was absent in all but one, the  
364 diatom *Thalassionema nitzschiodes*. Equal numbers of Alveolata species encoded METH and CBA1,  
365 or METH only; interestingly, the latter were all non-photosynthetic lineages. Grouping the data from  
366 these 4 algal groups, a Chi Square test was significant for CBA1 and METH being more often both  
367 present or both absent ( $\chi^2 (1, N = 86) = 9.2, p = 0.00240$ ). The association could be due to linkage,  
368 although in neither *C. reinhardtii* nor *P. tricornutum* are the two genes on the same chromosome,  
369 making this unlikely. Alternatively, there is a fitness advantage in both genes being acquired or lost  
370 together.

371  
372 Most fungal taxa lacked both METH and CBA1, but we found examples of 6 species that were  
373 predicted to be B<sub>12</sub> users (METH present) and 5 of these were also predicted to contain CBA1-like  
374 sequences: *Allomyces macrogynus*, *Spizellomyces punctatus*, *Rhizophagus irregularis*, *Rhizopus*  
375 *delemar* and *Phycomyces blakesleeanus*. CBA1-like sequences were identified in the Opisthokonta  
376 and Amoebozoa, although were less prevalent, with ~23% of choanoflagellates and 8% of amoeboid  
377 species being like algae in having both METH and CBA1. CBA1 was entirely absent from the  
378 Metazoa. In contrast, in the Streptophyta, which include multicellular green algae and all land plants,  
379 the majority lack METH, but almost 80% of species were found to contain CBA1-like sequences.  
380 This implies that Streptophyta CBA1 sequences may have gained a different function, which would  
381 be consistent with the lack of B<sub>12</sub>-dependent metabolism in these organisms. In summary, these data  
382 suggest that CBA1 is associated with vitamin B<sub>12</sub> use to different degrees in different eukaryotic  
383 groups, with there being a greater association in obligate and facultative B<sub>12</sub> users than in those  
384 organisms that do not utilise B<sub>12</sub>.

385



386 The many putative CBA1 homologues in algal lineages and their strong association with B<sub>12</sub> uptake  
387 provided an opportunity to identify conserved, and thus likely functionally important, residues.  
388 Accordingly, a multiple sequence alignment of proteins matching the CBA1 HMM query was  
389 generated (Figure S7). Highlighted in green in the similarity matrix at the top are nine conserved  
390 regions with several almost completely conserved residues; these are shown in more detail in Figure  
391 8a for selected taxa representing different algal groups. Further insight came from inspection of the  
392 model of the 3D structure of CrCBA1 generated by the Phyre2 structural prediction server. The  
393 analysis showed that regions of CrCBA1 showed similarity to bacterial periplasmic binding proteins,  
394 including the B<sub>12</sub>-binding protein BtuF. A structure is available of *E. coli* BtuF in complex with B<sub>12</sub>  
395 (Borths et al., 2002), so we compared this to the modelled CrCBA1 structure. Although there is little  
396 sequence similarity, alignment of the two structures resulted in an RMSD of 3.362 and enabled the  
397 relative position of B<sub>12</sub> to be placed in the lower cleft of CrCBA1, shown in red in Figure 8b.  
398 Mapping of the highly conserved residues onto this structure found that many (P251, V253, W255,  
399 W394, F395 and E396) were in a cluster around the relative position of B<sub>12</sub>. Another cluster of highly  
400 conserved residues were located at the end of the upper alpha helix (P118, L136, F214, F215, N216  
401 and E218). Both clusters represent promising mutational targets to investigate CrCBA1 function.

402

403

#### 404 **DISCUSSION**

405 In this study we have shown experimentally that a conserved protein, CBA1, is required for the  
406 uptake of the micronutrient B<sub>12</sub> in two taxonomically distant algae, the diatom *P. tricornutum* (Figure  
407 1) and the chlorophyte *C. reinhardtii* (Figures 3 & 4). Strains with knockouts of the gene were unable  
408 to take up B<sub>12</sub>, demonstrating that there is no functional redundancy of this protein in either organism.  
409 This is also the first *in vivo* evidence that CBA1 is present outside the Stramenopiles. Moreover, we  
410 found widespread occurrence of CBA1 homologues with considerable sequence conservation across  
411 eukaryotic lineages (Figures 7 and S7). The strong correlation of CBA1 with the B<sub>12</sub>-dependent  
412 methionine synthase, METH, in algal lineages, provides evidence that CBA1 is a key component of  
413 the B<sub>12</sub> uptake process in evolutionarily distinct microalgae, and the structural similarities between



414 CBA1 and BtuF (Figure 8b), suggest it may operate as a B<sub>12</sub>-binding protein. The highly conserved  
415 residues identified in the algal homologues (Figure 8a) offer the means to establish which are  
416 functionally important, facilitated by the uptake assay we established.  
417  
418 Nonetheless, the mechanistic role of CBA1 in the process of B<sub>12</sub> acquisition in algae is not yet clear.  
419 Previous physiological studies of B<sub>12</sub> uptake by microalgae, such as the haptophyte *Diacronema*  
420 *lutheri* (Droop, 1968), indicated a biphasic process: firstly rapid irreversible adsorption of B<sub>12</sub> to the  
421 cell exterior, followed by a slower second step of B<sub>12</sub> uptake into the cell, consistent with endocytosis.  
422 CBA1 is unlikely to be associated with the binding of B<sub>12</sub> in the cell wall, however. This is because  
423 the *C. reinhardtii* strains used in this study, UVM4 and CW15, were cell wall deficient, and therefore  
424 likely also deficient in cell wall proteins that bind B<sub>12</sub>; the lack of a B<sub>12</sub>-BODIPY signal from the cell  
425 surface in IM4 (Figure S2) supports this hypothesis. Further use of this fluorescent probe offers the  
426 possibility to monitor the localisation of B<sub>12</sub>-BODIPIY over time to gain insights into the stages of B<sub>12</sub>  
427 uptake, as has been done in other organisms (Lawrence et al., 2018). In addition, confocal microscopy  
428 of CBA1-mVenus fusion protein in *C. reinhardtii* (Figure 5) showed an apparent association of  
429 CrCBA1 with the plasma membrane and endomembranes, which is similar to that for ER-localised  
430 proteins (Mackinder et al., 2017). Moreover, in a proteomics study of lipid droplets (which form by  
431 budding from the ER) CBA1 was in the top 20 most abundant proteins (Goold et al., 2016). Bertrand  
432 et al. (2012) found that PtCBA1 had a signal peptide and fluorescently tagged PtCBA1 was also  
433 targeted to the ER. Nonetheless, based on its predicted 3D structure and the fact that it has at most one  
434 transmembrane helix, CBA1 does not appear to be a transporter itself. Instead, given its structural  
435 similarity to BtuF, a distinct possibility is that CBA1 is the soluble component of an ABC transporter,  
436 either at the plasma membrane or an internal membrane, and likely will interact with one or more  
437 other proteins to allow B<sub>12</sub> uptake to occur, at least some of them being those involved in receptor-  
438 mediated endocytosis, as is the case for B<sub>12</sub> acquisition in humans (Rutsch et al., 2009; Beedholm-  
439 Ebsen et al., 2010; Coelho et al., 2012). In this context, there are known similarities between  
440 endocytosis in *C. reinhardtii* and humans (Denning and Fulton, 1989; Bykov et al., 2017), and several  
441 putative homologues have been identified by sequence similarity in the alga. Testing the B<sub>12</sub>-uptake

442 capacity of mutants of these proteins would be one approach to investigate whether their roles are also  
443 conserved.

444

445 In contrast to the situation in algae, the Streptophyta live in a B<sub>12</sub>-free world, neither synthesising nor  
446 utilising this cofactor. This is exemplified by the fact that in our analysis only one species, the  
447 charophyte alga *Cylindrocystis brebissonii*, encoded METH. Despite this, more than three-quarters of  
448 this group encode a CBA1 homologue (Figures 7 & S7). Since the majority of the conserved residues  
449 (Figure 8a) are also found in putative CBA1 sequences in the angiosperms such as *Arabidopsis*,  
450 including those around the potential binding pocket, it is possible that the streptophyte protein has  
451 acquired a new function that still binds a tetrapyrrole molecule. Intriguingly, the reverse is observed in  
452 the Metazoa, where METH is almost universal, but CBA1 is entirely absent. However, some  
453 Choanoflagellates and some species of fungi do appear to encode both METH and CBA1, suggesting  
454 that they utilise B<sub>12</sub>, a trait only recently recognised to occur in fungi (Orłowska et al., 2021). It will  
455 be of interest therefore to test whether CBA1 is involved in B<sub>12</sub> uptake in these organisms, for  
456 example by gene knockout studies.

457

458 The importance of B<sub>12</sub> availability for phytoplankton productivity has been demonstrated across  
459 several marine ecosystems by amendment experiments (e.g. Bertrand et al., 2011; Koch et al., 2012;  
460 Joglar et al., 2021), where addition of B<sub>12</sub> led to algal blooms and affected the composition and  
461 stability of microbial communities. The mode of acquisition of this micronutrient is thus likely to be  
462 highly conserved and subject to significant ecological and evolutionary selection pressure to be  
463 retained. Moreover, the role of B<sub>12</sub> at the cellular level may well provide a direct connection between  
464 environmental conditions and the epigenetic status of the genome: methionine synthase is the key  
465 enzyme in C1 metabolism, linking the folate and methylation cycles and thus responsible for  
466 maintaining levels of S-adenosylmethionine (SAM) the universal methyl donor (Hanson & Roje  
467 2001; Mentch & Locasale, 2016). In this context, it is noteworthy that the knockout of *CBA1* in the  
468 IM4 line was the result of insertion of a class II transposable element into the gene. This mobilization  
469 is likely to reflect epigenetic alterations of the autonomous element, presumably as a result of cellular

470 stress either from the antibiotic selection, or the transformation procedure, or both. Recent  
471 classification of the transposons in *C. reinhardtii* indicate that the transposon inserted into *CBA1* in  
472 IM4 is a member of the KDZ superfamily of class II TIR elements named Kyakuja-3\_cRei (Craig et  
473 al. 2021). If the phenomenon of inactivation of a gene that is deleterious (in this case allowing B<sub>12</sub> to  
474 be taken up and repress the antibiotic resistance gene) via transposition is a general response in *C.*  
475 *reinhardtii*, repeating the screen for CBA1 mutants might allow observation of further transposition  
476 events, and enable characterisation of this group of elements at the functional level. Moreover, it  
477 could be adopted as a more general methodology to identify candidate genes involved in other  
478 physiological processes, by tying their expected effects to deleterious outcomes through synthetic  
479 biology constructs and screening surviving mutants by sequencing.

480

481

## 482 MATERIALS AND METHODS

483

### 484 Organisms and growth conditions

485 Strains, media and growth conditions used in this study are listed in Table S1. If required, antibiotics,  
486 vitamin B<sub>12</sub> (cyanocobalamin) and thiamine were added to the medium at concentrations indicated.  
487 Algal culture density was measured using a Z2 particle count analyser (Beckman Coulter Ltd.) and  
488 optical density (OD) at 730 nm was measured using a FluoStar OPTIMA (BMG labtech) plate reader  
489 or a CLARIOstar plate reader (BMG labtech). Bacterial growth was recorded by measuring OD<sub>595</sub>.

490

### 491 Algal B<sub>12</sub>-uptake assay

492 Algal cultures were grown to stationary phase and cyanocobalamin salt (Sigma) was added (*P.*  
493 *tricornutum*: 600 pg; *C. reinhardtii*: 150 pg) to 5 x 10<sup>6</sup> cells in a final volume of 1 ml in f/2 or TAP  
494 medium respectively. The samples were incubated at 25°C under continuous light with shaking for 1  
495 hour and inverted every 30 minutes to aid mixing. Samples were centrifuged and the supernatant  
496 (media fraction) transferred into a fresh microcentrifuge tube. The cell pellet was resuspended in 1 ml  
497 water. Both samples were boiled for 10-20 minutes to release any cellular or bound B<sub>12</sub> into solution,  
498 and then centrifuged to pellet debris. The supernatant was used in the *S. typhimurium* B<sub>12</sub> bioassay as  
499 described in Bunbury et al. (2020). The amount of B<sub>12</sub> in the sample was calculated by comparison to  
500 a standard curve of known B<sub>12</sub> concentrations fitted to a 4 parameter logistic equation  $f(x) = c + (d -$   
501  $c)/(1 + \exp(b(\log(x) - \log(e))))$  (Ritz et al., 2015). This standard curve was regenerated with every  
502 bioassay experiment.

503

### 504 Generating *P. tricornutum* CBA1 knockout lines using CRISPR-Cas9

505 CRISPR/Cas9 genome editing applied the single guide RNA (sgRNA) design strategy described in  
506 Hopes et al., (2017). Details are provided in the Supplementary methods. *P. tricornutum* CCAP  
507 1055/1 cells were co-transformed with linearised plasmids pMLP2117 and pMLP2127 using a  
508 NEPA21 Type II electroporator (Nepa Gene) as previously described (Yu et al., 2021). After plating  
509 on 1% agar selection plates containing 75 mg·l<sup>-1</sup> zeocin and incubation for 2-3 weeks, zeocin resistant  
510 colonies were picked into 96 well plates containing 200 µl of f/2 media with 75 mg·l<sup>-1</sup> zeocin. After  
511 seven days strains were subcultured into fresh media either containing 75 mg·l<sup>-1</sup> zeocin or 300 mg·l<sup>-1</sup>  
512 nourseothricin, and genotyped with a three-primer PCR using PHIRE polymerase (Thermo Fisher

513 Scientific) with primers gCBA1.fwd, gCBA1.rv and NAT.rv (Table S2). Five promising colonies  
514 resistant to nourseothricin and with genotypes showing homologous recombination or indels were re-  
515 streaked on 75 mg·l<sup>-1</sup> zeocin f/2 plates to obtain secondary monoclonal colonies. Twelve secondary  
516 colonies were picked for each primary colony after 2-3 weeks and again genotyped with a three-  
517 primer PCR. Promising colonies were genotyped in further detail with primer pairs  
518 gCBA1.fwd/gCBA1.rv, gCBA1.fwd/NAT.rv and gCBA1in.fwd/gCBA1in.rv (Table S2).

### 519 **Construct assembly and *C. reinhardtii* transformation**

520 Constructs were generated using Golden Gate cloning, using parts from the *Chlamydomonas* MoClo  
521 toolkit (Crozet et al., 2018) and some that were created in this work. All parts relating to  
522 *Cre02.g081050* were domesticated from UVM4 genomic DNA, with BpiI and BsaI sites removed  
523 from the promoter, ORF and terminator by PCR based mutagenesis. A list of plasmids used in this  
524 study is shown in Table S2. Transformation of *C. reinhardtii* cultures with linearised DNA was  
525 carried out by electroporation essentially as described by Mehrshahi et al. (2020) before plating on  
526 TAP-agar plates with the appropriate antibiotics.

527  
528  
529 Insertional mutagenesis was performed as above, however, cultures were grown to a density of  
530 approximately 1x10<sup>7</sup> cells/ml and were incubated with 500 ng transgene cassette. After allowing the  
531 cells to recover overnight in TAP plus 60 mM sucrose at 25°C in low light (less than 10 μmol photon  
532 m<sup>-2</sup>.s<sup>-1</sup> at 100 rpm), between 200 - 250 μl of transformants were plated on solid TAP media (square  
533 12x12 cm petri dishes) containing ranges of 15-20 μg/ml hygromycin, 20-50 μg/ml paromomycin and  
534 48-1024 ng/l vitamin B12, and the plates were incubated in standing incubators.

### 535 **Confocal laser scanning microscopy**

536 *C. reinhardtii* transformants carrying the pAS\_C2 construct were imaged in a confocal laser scanning  
537 microscope (TCS SP8, Leica Microsystems, Germany) with an HC PL APO CS2 40x/1.30 aperture  
538 oil-immersion lens. Images were taken using the sequential mode provided by the Leica LAS  
539 software, with the channel used for mVenus and brightfield detection being taken first with excitation  
540 from a white light source at 486 nm and emissions were detected between 520 - 567 nm, followed by  
541 chlorophyll detection (excitation 514 nm, emission 687-724 nm). The overlay images were produced  
542 automatically by the Leica LAS software. Inkscape was used to increase the lightness and decrease  
543 the contrast of all the images in the same manner.

### 544 **Quantitative real-time PCR**

545  
546 Quantification of steady state levels of transcripts was carried out according to Bunbury et al. (2020),  
547 using random hexamer primers for cDNA synthesis. The qPCR data was analysed using the ΔΔCT  
548 method with an assumed amplification efficiency of 2. Log<sub>2</sub>(2-ΔCT) values were plotted in the  
549 resulting figures.

### 550 **Whole genome sequencing**

551  
552 Genomic DNA was extracted from *C. reinhardtii* cells by phenol-chloroform extraction and  
553 sequenced using the NovaSeq sequencing platform by Novogene (Cambridge, UK) to produce 150 bp  
554 paired-end reads. This involved RNase treatment and library preparation with the NEBNext Ultra II  
555 DNA Library Prep Kit (PCR-free), which generated 350 bp inserts. The raw sequencing data for this  
556 study have been deposited in the European Nucleotide Archive (ENA) at EMBL-EBI under accession  
557 number PRJEB58730 (<https://www.ebi.ac.uk/ena/browser/view/PRJEB58730>). Novogene performed  
558 all quality filtering, summary statistics and bioinformatic analysis. The location of the Hyg3 cassette  
559 was determined by identifying loci that comprised reads from IM4 that mapped between genomic  
560 DNA and pHyg3, and cross-referencing these loci against the parental strains. The TE identification  
561 was carried out similarly, full details are provided in Supplementary Methods.

### 562 **Bioinformatics pipeline**

563  
564 The EukProt database was assessed for the presence of METE, METH and CBA1 (Richter et al.,  
565 2022). The query used for CBA1 was a hidden Markov model (HMM) generated from the protein  
566 fasta sequences: Phatr3\_J48322, Thaps3\_11697, Fracy1\_241429, Fracy1\_246327, Auran1\_63075,  
567

568 Ectocarpus siliculosus D8LMT1 and Cre02.g081050.t1.2 by first aligning using MAFFT (Kato and  
569 Standley, 2013) version 7.470 with the --auto option, and then building a HMM using hmmbuild  
570 (hmmer 3.2.1). Additionally, protein fasta (Cre06.g250902, Cre03.g180750), PFAM (PF02310,  
571 PF02965, PF00809, PF02574, PF01717, PF08267) and KO (K00548, K00549) queries were searched  
572 against EukProt to identify sequences with similarity to METE and METH. The queries were  
573 searched against EukProt using hmmsearch (HMMER 3.1b2). The default bitscore thresholds were  
574 used for KO and PFAM queries. The threshold used for CBA1 HMM, and the CrMETE and CrMETH  
575 protein fasta sequences, was a full-length e-value of 1e-20. For each protein, all individual queries  
576 were required to be significant to classify the protein as present. The best hit in each species was  
577 identified by taking the protein with the greatest geometric mean of full length bitscores for the  
578 queries. The dataset was joined with taxonomic information from EukProt and completeness  
579 information calculated using BUSCO version 4.1.4 and eukaryote\_odb10 (Manni et al., 2021).  
580  
581

## 582 **Acknowledgements**

583 We thank Catherine Sutherland for help with maintaining and screening the CRISPR/Cas9 mutants of *P.*  
584 *tricornutum* and Dr Lorraine Archer for lab management. We are grateful to Dr Amanda Hopes and Prof  
585 Thomas Mock (University of East Anglia) for the parts used in gene editing of *PtCBA1*. The plasmid Hyg3  
586 used in the insertional mutagenesis was obtained from the Chlamydomonas Resource Centre  
587 ([www.chlamycollection.org](http://www.chlamycollection.org)). This work was supported by the UK's Biotechnology and Biological Sciences  
588 Research Council (BBSRC) Doctoral Training Partnership, grant no. BB/M011194/1 to A.P.S., M.L.P. and  
589 A.G.S; grant no. BB/M018180/ 1 to P.M. and A.G.S.; grant no. BB/L002957/1 and BB/R021694/1 to K.G.  
590 and AGS; grant no. BB/L014130/1 to G.I.M, K.G., P.M. and A.G.S; grant no. BB/S002197/1 to M.J.W;  
591 University of Cambridge Broodbank Fellowship to G.I.M; Royal Society grant no. INF\R2\180062 to  
592 M.J.W.; and Bill & Melinda Gates Foundation grant OPP1144 and Gates Cambridge Trust (Graduate  
593 Student Fellowship) to A.H. For the purpose of open access, the authors have applied a Creative Commons  
594 Attribution (CC BY) licence to any Author Accepted Manuscript version arising from this submission.

595

## 596 **Author contributions**

597 APS designed and performed research, analysed data and wrote the article with contributions from all  
598 the authors. KG and MLP carried out the CRISPR/Cas9 editing of *Phaeodactylum* and contributed to  
599 writing the article. AH carried out the bioinformatics analysis to identify the putative transposable  
600 elements. MJW & ADL synthesised the BODIPY-labelled B<sub>12</sub> and contributed to writing the article.  
601 KG, GMO and PM supervised aspects of the project and contributed to writing the article. AGS

602 conceived the project, obtained the funding, supervised the project and wrote the article with  
603 contributions from all the authors. AGS agrees to serve as the author responsible for contact and  
604 ensures communication.

605

## 606 References

607

608 **Allen, MD, del Campo JA, Kropat J, Merchant SS (2007)** [FEA1, FEA2, and FRE1, encoding](#)  
609 [two homologous secreted proteins and a candidate ferrireductase, are expressed coordinately with](#)  
610 [FOX1 and FTR1 in iron-deficient \*Chlamydomonas reinhardtii\*](#). *Eukaryotic Cell* **6**: 1841–1852

611 **Almagro Armenteros J, Sønderby CK, Sønderby SK, Nielsen H, Winther O (2017)** [DeepLoc:](#)  
612 [Prediction of protein subcellular localization using deep learning](#). *Bioinformatics* **33**: 3387–3395

613 **Almagro Armenteros J, Tsirigos KD, Sønderby CK, Petersen TN, Winther O, Brunak S,**  
614 **Heijne G von, Nielsen H (2019)** [SignalP 5.0 improves signal peptide predictions using deep](#)  
615 [neural networks](#). *Nature Biotechnology* **37**: 420–423

616 **Banerjee R, Gouda H, Pillay S (2021)** [Redox-linked coordination chemistry directs vitamin B<sub>12</sub>](#)  
617 [trafficking](#). *Accounts of Chemical Research* **54**: 2003–2013

618 **Beedholm-Ebsen R, Wetering KVD, Hardlei T, Nexø E, Borst P, Søren K, Moestrup SK**  
619 **(2010)** [Identification of multidrug resistance protein 1 \(MRP1/ABCC1\) as a molecular gate for](#)  
620 [cellular export of cobalamin](#). *Blood* **115**: 1632–1639

621 **Bertrand EM, Saito MA, Rose JM, Riesselman CR, Lohan MC, Noble AE, Lee PA, DiTullio**  
622 **GR (2011)** [Vitamin B<sub>12</sub> and iron colimitation of phytoplankton growth in the Ross Sea](#). *Limnol*  
623 *Oceanogr* **52**: 1079–1093

624 **Bertrand EM, Allen AE, Dupont CL, Norden-Krichmar TM, Bai J, Valas RE, Saito MA**  
625 **(2012)** [Influence of cobalamin scarcity on diatom molecular physiology and identification of a](#)  
626 [cobalamin acquisition protein](#). *Proc Natl Acad Sci U S A* **109**: E1762–71

627 **Borths EL, Locher KP, Lee AT, Rees DC (2002)** [The structure of \*Escherichia coli\* BtuF and](#)  
628 [binding to its cognate ATP binding cassette transporter](#). *Proc Natl Acad Sci U S A* **99**: 16642–7

629 **Bunbury F, Helliwell KE, Mehrshahi P, Davey MP, Salmon DL, Holzer A, Smirnov N,**  
630 **Smith AG (2020)** [Responses of a newly evolved auxotroph of \*Chlamydomonas\* to B<sub>12</sub>](#)  
631 [deprivation](#). *Plant Physiology* **183**: 167–178

632 **Bykov YS, Schaffer M, Dodonova SO, Albert S, Plitzko JM, Baumeister W, Engel BD,**  
633 **Briggs JA (2017)** [The structure of the COPI coat determined within the cell](#). *eLife* **6**: e32493

634 **Carlucci FA, Silbernagel BS, McNally MP (2007)** [The influence of temperature and solar](#)  
635 [radiation on persistence of vitamin B<sub>12</sub>, thiamine, and biotin in seawater](#). *Journal of Phycology* **5**:  
636 302–305

637 **Choi CC, Ford RC (2021)** [ATP binding cassette importers in eukaryotic organisms](#). *Biological*  
638 *Reviews* **96**: 1318–1330

639 **Coelho D, Kim JC, Mioussé IR, Fung S, Moulin M du, Buers I, Suormala T, Burda P,**  
640 **Frapolli M, Stucki M, et al (2012)** [Mutations in ABCD4 cause a new inborn error of vitamin](#)  
641 [B<sub>12</sub> metabolism](#). *Nature Genetics* **44**: 1152–1155



- 642 **Craig RJ, Hasan AR, Ness RW, Keightley PD** (2021) [Comparative genomics of](#)  
643 [Chlamydomonas](#). *Plant Cell* **33**:1016-1041
- 644 **Croft MT, Lawrence AD, Raux-Deery E, Warren MJ, Smith AG** (2005) [Algae acquire](#)  
645 [vitamin B<sub>12</sub> through a symbiotic relationship with bacteria](#). *Nature* **438**: 90–3
- 646 **Crozet P, Navarro FJ, Willmund F, Mehrshahi P, Bakowski K, Lauersen KJ, Pérez-Pérez**  
647 **M-E, Auroy P, Gorchs Rovira A, Sauret-Gueto S, et al** (2018) [Birth of a photosynthetic](#)  
648 [chassis: A MoClo toolkit enabling synthetic biology in the microalga \*Chlamydomonas\*](#)  
649 [reinhardtii](#). *ACS Synthetic Biology* **7**: 2074–2086
- 650 **Denning GM, Fulton AB** (1989) [Purification and characterization of clathrin-coated vesicles](#)  
651 [from \*Chlamydomonas\*](#). *The Journal of Protozoology* **36**: 334–340
- 652 **Droop MR** (1968) [Vitamin B<sub>12</sub> and marine ecology. IV. The kinetics of uptake, growth and](#)  
653 [inhibition in \*Monochrysis lutheri\*](#). *Journal of the Marine Biological Association of the United*  
654 *Kingdom* **48**: 689–733
- 655 **Field CB, Behrenfeld MJ, Randerson JT, Falkowski P** (1998) [Primary production of the](#)  
656 [biosphere: Integrating terrestrial and oceanic components](#). *Science* **281**: 237–240
- 657 **Gonzalez JC, Banerjee RV, Huang S, Sumner JS, Matthews RG** (1992) [Comparison of](#)  
658 [cobalamin-independent and cobalamin-dependent methionine synthases from \*Escherichia coli\*:](#)  
659 [Two solutions to the same chemical problem](#). *Biochemistry* **31**: 6045–6056
- 660 **Goold HD, Cuiné S, Légeret B, Liang Y, Brugière S, Auroy P, Javot H, Tardif M, Jones B,**  
661 **Beisson F, et al** (2016) [Saturating light induces sustained accumulation of oil in plastidal lipid](#)  
662 [droplets in \*Chlamydomonas reinhardtii\*](#). *Plant Physiology* **171**: 2406–2417
- 663 **Hanson AD, Roje S** (2001) [One-Carbon metabolism in higher plants](#). *Ann Rev Plant Physiol* **52**:  
664 119-137
- 665 **Helliwell KE, Collins S, Kazamia E, Purton S, Wheeler GL, Smith AG** (2015) [Fundamental](#)  
666 [shift in vitamin B<sub>12</sub> eco-physiology of a model alga demonstrated by experimental evolution](#).  
667 *ISME J* **9**: 1446–1455
- 668 **Helliwell KE, Scaife MA, Sasso S, Araujo APU, Purton S, Smith AG** (2014) [Unraveling](#)  
669 [vitamin B<sub>12</sub>-responsive gene regulation in algae](#). *Plant Physiol* **165**: 388–397
- 670 **Helliwell KE, Wheeler GL, Leptos KC, Goldstein RE, Smith AG** (2011) [Insights into the](#)  
671 [evolution of vitamin B<sub>12</sub> auxotrophy from sequenced algal genomes](#). *Molecular Biology and*  
672 *Evolution* **28**: 2921–2933
- 673 **Hopes A, Nekrasov V, Belshaw N, Grouneva I, Kamoun S, Mock T** (2017) [Genome editing in](#)  
674 [diatoms using CRISPR-cas to induce precise bi-allelic deletions](#). *Bio Protoc* **7**: e2625
- 675 **Joglar V, Pontiller B, Martínez-García S, Fuentes-Lema A, Pérez-Lorenzo M, Lundin D,**  
676 **Pinhassi J Fernández E, Teira E** (2021) [Microbial plankton community structure and function](#)  
677 [responses to vitamin B<sub>12</sub> and B<sub>1</sub> amendments in an upwelling system](#). *Appl Environ Microbiol* **87**:  
678 e0152521.
- 679 **Kadner RJ** (1990) [Vitamin B<sub>12</sub> transport in \*Escherichia coli\*: Energy coupling between](#)  
680 [membranes](#). *Molecular Microbiology* **4**: 2027–2033
- 681 **Katoh K, Standley DM** (2013) [MAFFT multiple sequence alignment software version 7:](#)  
682 [Improvements in performance and usability](#). *Molecular Biology and Evolution* **30**: 772–780

- 683 **Kelley LA, Mezulis S, Yates CM, Wass MN, Sternberg MJE** (2015) [The Phyre2 web portal for](#)  
684 [protein modeling, prediction and analysis](#). *Nat Protoc* **10**: 845–58
- 685 **King N, Westbrook MJ, Young SL, Kuo A, Abedin M, Chapman J, et al.** (2008). [The](#)  
686 [genome of the choanoflagellate \*Monosiga brevicollis\* and the origin of metazoans](#). *Nature*. **451**:  
687 783–788.
- 688 **Koch F, Hattenrath-Lehmann TK, Goleski JA, Sañudo-Wilhelmy S, Fisher NS, Gobler CJ.**  
689 2012. [Vitamin B<sub>1</sub> and B<sub>12</sub> uptake and cycling by plankton communities in coastal](#)  
690 [ecosystems](#). *Front Microbiol* **3**:363.
- 691 **Lawrence AD, Nemoto-Smith E, Deery E, Baker JA, Schroeder S, Brown DG, Tullet JMA,**  
692 **Howard MJ, Brown IR, Smith AG, et al** (2018) [Construction of fluorescent analogs to follow](#)  
693 [the uptake and distribution of cobalamin \(vitamin B<sub>12</sub>\) in bacteria, worms, and plants](#). *Cell Chem*  
694 *Biol* **25**: 941–951
- 695 **Li X, Zhang R, Patena W, Gang SS, Blum SR, Ivanova N, Yue R, Robertson JM, Lefebvre**  
696 **PA, Fitz-Gibbon ST, et al** (2016) [An indexed, mapped mutant library enables reverse genetics](#)  
697 [studies of biological processes in \*Chlamydomonas reinhardtii\*](#). *Plant Cell* **28**: 367–87
- 698 **Mackinder LCM, Chen C, Leib RD, Patena W, Blum SR, Rodman M, Ramundo S, Adams**  
699 **CM, Jonikas MC** (2017) [A spatial interactome reveals the protein organization of the algal CO<sub>2</sub>](#)  
700 [concentrating mechanism](#). *Cell* **171**: 133–147.e14
- 701 **Manni M, Berkeley MR, Seppey M, Simão FA, Zdobnov EM** (2021) [BUSCO update: Novel](#)  
702 [and streamlined workflows along with broader and deeper phylogenetic coverage for scoring of](#)  
703 [eukaryotic, prokaryotic, and viral genomes](#). *Molecular Biology and Evolution* **38**: 4647–4654
- 704 **Mehrshahi P, Nguyen GTDT, Gorchs Rovira A, Sayer A, Llaveró-Pasquina M, Lim Huei**  
705 **Sin M, Medcalf EJ, Mendoza-Ochoa GI, Scaife MA, Smith AG** (2020) [Development of novel](#)  
706 [riboswitches for synthetic biology in the green alga \*Chlamydomonas\*](#). *ACS Synthetic Biology* **9**:  
707 1406–1417
- 708 **Mentch SJ, Locasale JW** (2016) [One-carbon metabolism and epigenetics: understanding the](#)  
709 [specificity](#) *Annal NY Acad Sci* **1363**: 91-8
- 710 **Mitchell AL, Attwood TK, Babbitt PC, Blum M, Bork P, Bridge A, Brown SD, Chang H-Y,**  
711 **El-Gebali S, Fraser MI et al.** (2019) [InterPro in 2019: improving coverage, classification and](#)  
712 [access to protein sequence annotations](#). *Nucl Acids Res* **47**: D351–D360
- 713 **Neupert J, Karcher D, Bock R** (2009) [Generation of \*Chlamydomonas\* strains that efficiently](#)  
714 [express nuclear transgenes](#). *The Plant Journal* **57**: 1140–1150
- 715 **Nielsen MJ, Rasmussen MR, Andersen CBF, Nexø E, Moestrup SK** (2012) [Vitamin B<sub>12</sub>](#)  
716 [transport from food to the body's cells—a sophisticated, multistep pathway](#). *Nature Reviews*  
717 *Gastroenterology & Hepatology* **9**: 345–354
- 718 **Ohwada K** (1973) [Seasonal cycles of vitamin B<sub>12</sub>, thiamine and biotin in Lake Sagami. Patterns](#)  
719 [of their distribution and ecological significance](#). *Internationale Revue der gesamten*  
720 *Hydrobiologie und Hydrographie* **58**: 851–871
- 721 **Orłowska M, Steczkiewicz K, Muszewska A** (2021) [Utilization of cobalamin is ubiquitous in](#)  
722 [early-branching fungal phyla](#). *Genome Biology and Evolution* **13**: evab043
- 723 **Panzeca C, Beck AJ, Tovar-Sanchez A, Segovia-Zavala J, Taylor GT, Gobler CJ, Sañudo-**  
724 **Wilhelmy SA** (2009) [Distributions of dissolved vitamin B<sub>12</sub> and Co in coastal and open-ocean](#)  
725 [environments](#). *Estuarine, Coastal and Shelf Science* **85**: 223–230



- 726 **Pintner IJ, Altmeyer VL** (1979) [Vitamin B<sub>12</sub>-binder and other algal inhibitors](#) Journal of  
727 Phycology **15**: 391–398
- 728 **Richter DJ, Berney C, Strassert JFH, Poh Y-P, Herman EK, Muñoz-Gómez SA, Wideman**  
729 **JG, Burki F, Vargas C de** (2022) [EukProt: A database of genome-scale predicted proteins across](#)  
730 [the diversity of eukaryotes](#). Peer Community Journal **2**: e56
- 731 **Ritz C, Baty F, Streibig JC, Gerhard D** (2015) [Dose-response analysis using R](#). PLoS One **10**:  
732 e0146021
- 733 **Rutsch F, Gailus S, Miousse IR, Suormala T, Sagné C, Toliat MR, Nürnberg G, Wittkamp**  
734 **T, Buers I, Sharifi A, et al** (2009) [Identification of a putative lysosomal cobalamin exporter](#)  
735 [altered in the cblF defect of vitamin B<sub>12</sub> metabolism](#). Nature Genetics **41**: 234–239
- 736 **Sahni MK, Spanos S, Wahrman MZ, Sharma GM** (2001) [Marine corrinoid-binding proteins](#)  
737 [for the direct determination of vitamin B<sub>12</sub> by radioassay](#). Analytical Biochemistry **289**: 68–76
- 738 **Sañudo-Wilhelmy SA, Gómez-Consarnau L, Suffridge C, Webb EA** (2014) [The role of B](#)  
739 [vitamins in marine biogeochemistry](#). Annual Review of Marine Science **6**: 339–367
- 740 **Shelton AN, Seth EC, Mok KC, Han AW, Jackson SN, Haft DR, Taga ME** (2019) [Uneven](#)  
741 [distribution of cobamide biosynthesis and dependence in bacteria predicted by comparative](#)  
742 [genomics](#). The ISME Journal **13**: 789–804
- 743 **Tang YZ, Koch F, Gobler CJ** (2010) [Most harmful algal bloom species are vitamin B<sub>1</sub> and B<sub>12</sub>](#)  
744 [auxotrophs](#). Proc Natl Acad Sci U S A **107**: 20756–61
- 745 **Warren MJ, Raux E, Schubert HL, Escalante-Semerena JC** (2002) [The biosynthesis of](#)  
746 [adenosylcobalamin \(vitamin B<sub>12</sub>\)](#). Natural product reports **19**: 390–412
- 747 **Xie B, Bishop S, Stessman D, Wright D, Spalding MH, Halverson LJ** (2013) [Chlamydomonas](#)  
748 [reinhardtii thermal tolerance enhancement mediated by a mutualistic interaction with vitamin B<sub>12</sub>-](#)  
749 [producing bacteria](#). ISME J **7**: 1544–55
- 750 **Yu Z, Geisler K, Leontidou T, Young REB, Vonlanthen SE, Purton S, Abell C, Smith AG**  
751 (2021) [Droplet-based microfluidic screening and sorting of microalgal populations for strain](#)  
752 [engineering applications](#). Algal Res **56**: 102293
- 753
- 754
- 755
- 756
- 757

758 **Figure Legends**

759

760 **Figure 1. Disruption of *Phaeodactylum tricornutum* *CBA1* (*PtCBA1*) using CRISPR-**  
761 **Cas9 yielded lines with impaired B<sub>12</sub> uptake. a)** Schematic showing CRISPR-Cas9 sgRNA  
762 target sites and the homology repair template design used to generate mutant lines in *PtCBA1*  
763 (Phatr3\_J48322). The homology repair template schematic is annotated with the 5' homology  
764 region (HR) and 3'HR, the *FCPB* promoter, nourseothricin resistance gene (*NAT*) and *FCPC*  
765 terminator. The *PtCBA1* gene is annotated with the ORF, the 5'HR and 3'HR regions used in  
766 the homology template and the regions of the ORF targeted by sgRNA (vertical bars). Primer  
767 positions used for the analysis of putative mutant lines are shown with arrowheads. **b)** PCR of  
768 regions across and within wild-type (WT) and mutant *PtCBA1* in 3 independent CRISPR-  
769 Cas9 lines ( $\Delta$ CBA1) showing indel mutations in the mutants. PCR products from different  
770 sets of primers indicated in panel a are shown. M = marker, - Ctrl = no DNA template. **c)** A  
771 B<sub>12</sub> uptake assay was performed as described in Materials and Methods, to determine the  
772 amount of B<sub>12</sub> in the media and the cells after 1h incubation of *P. tricornutum* cells in 600 pg  
773 B<sub>12</sub>. The 'Total' was inferred by the addition of the cell and media fractions. The dashed line  
774 indicates the amount of B<sub>12</sub> added to the experiment. Standard deviation error bars are shown,  
775 n=4. Statistical analysis was performed on the media fraction, and Tukey's test identified the  
776 following comparisons to be significantly different from one another: WT vs No Algae  
777 ( $p < 1e^{-12}$ ); WT vs  $\Delta$ CBA1-1 ( $p < 1e^{-10}$ ); WT vs  $\Delta$ CBA1-2 ( $p < 1e^{-12}$ ); WT vs  $\Delta$ CBA1-3 ( $p < 1e^{-11}$ );  
778 No Algae vs  $\Delta$ CBA1-1 ( $p < 1e^{-03}$ ); No Algae vs  $\Delta$ CBA1-3 ( $p < 0.05$ ); and  $\Delta$ CBA1-1 vs  
779  $\Delta$ CBA1-2 ( $p < 1e^{-02}$ ).

780

781

782 **Figure 2. Generation and use of *C. reinhardtii* reporter strain UVM4-T12 for insertional**  
783 **mutagenesis. a)** Schematic of the constructs used for insertional mutagenesis of *C.*  
784 *reinhardtii*. The pAS\_R1 construct was designed to control expression of the paromomycin  
785 resistance gene (*aphVIII*) via B<sub>12</sub> mediated repression of the *METE* promoter (*P<sub>METE</sub>*). The  
786 pHyg3 construct encoded a constitutively expressed hygromycin resistance gene (*aphVII*), to  
787 be used for insertional mutagenesis. **b)** Growth of *C. reinhardtii* B<sub>12</sub> reporter strain UVM4-  
788 T12 bearing pAS\_R1 plasmid, in response to vitamin B<sub>12</sub> and paromomycin concentration in  
789 the media according to the algal dose-response assay. The predicted dose-response model is  
790 shown in black, with 95% confidence intervals in grey.

791

792

793 **Figure 3. *C. reinhardtii* insertional mutant IM4 is defective in B<sub>12</sub> response and uptake,**  
794 **and can be functionally complemented with *CrCBA1*. a)** Effect of vitamin B<sub>12</sub> on *METE*  
795 gene expression in UVM4 and IM4, determined by RT-qPCR. UVM4 and IM4 were grown  
796 in TAP media with or without 1000 ng·l<sup>-1</sup> vitamin B<sub>12</sub> for 4 days at 25°C, 120 rpm and in  
797 continuous light (90 μE·m<sup>-2</sup>·s<sup>-1</sup>). Boxplots of the log<sub>2</sub> transformed relative expression level of  
798 *METE* to the *RACK1* housekeeping gene are shown, n=6. Significant comparisons were  
799 identified using Tukey's test: UVM4 + 1000 ng·l<sup>-1</sup> vitamin B<sub>12</sub> from UVM4 No Addition  
800 ( $p < 1e^{-08}$ ), IM4 No Addition ( $p < 1e^{-08}$ ) and IM4 + 1000 ng·l<sup>-1</sup> vitamin B<sub>12</sub> ( $p < 1e^{-07}$ ). **b)**  
801 Schematic of the Cre02.g081050 gene showing the position of the insertion site (indicated  
802 with a black triangle) determined by whole genome sequencing (Figure S4). **c)** Schematic of  
803 the pAS\_C2 construct designed to express *CrCBA1* fused to the fluorescent reporter mVenus.  
804 *CrCBA1-mVenus* was under the control of the *CrCBA1* promoter and terminator. pAS\_C2  
805 also contained the spectinomycin resistance gene *aadA*, driven by the *PSAD* promoter and  
806 *PSAD* terminator. **d)** B<sub>12</sub>-uptake assay with UVM4, IM4 and IM4::pAS\_C2 (n =4 separate  
807 transformants with high mVenus expression). Dashed line indicates the amount of B<sub>12</sub> added

808 to the assay. Standard deviation error bars are shown. Statistical analysis was performed on  
809 the media fraction, and Tukey's test identified the following comparisons to be significantly  
810 different from one another: No Algae vs UVM4 ( $p < 1e^{-05}$ ); No Algae vs IM4 ( $p < 0.05$ ); No  
811 Algae vs IM4::pAS\_C2 ( $p < 1e^{-03}$ ); UVM4 vs 1.G2 ( $p < 1e^{-09}$ ); and 1.G2 vs 1.G2::pAS\_C2  
812 ( $p < 1e^{-06}$ ).

813

814

815 **Figure 4. CLiP mutants in CrCBA1 are impaired in their ability to take up B<sub>12</sub>. a)**

816 Schematic of the pAS\_C3 construct designed to express *CrCBA1* in a controllable manner  
817 using a thiamine repressible riboswitch ( $RS_{THI4\_AN}$ ) to allow repression of *CrCBA1* through  
818 the addition of thiamine (Mehrshahi et al., 2020). **b)** B<sub>12</sub>-uptake assay with cw15, LMJ-  
819 040682 and mean of 3 independent transformants of LMJ-040682::pAS\_C2 and LMJ-  
820 040682::pAS\_C3. The growth conditions were modified compared to previous assays: lines  
821 were grown with or without 10  $\mu$ M thiamine supplementation for 5 days in a 16/8 light/dark  
822 cycle, and 8 hours after the dark to light transition the cultures were used for the algal B<sub>12</sub>-  
823 uptake assay. The dashed line indicates the amount of B<sub>12</sub> added to the sample. Standard  
824 deviation error bars are shown. Statistical analysis was performed on the media fraction.  
825 Tukey's test identified the following algal strains to be significantly different from one  
826 another in media without thiamine (not reporting comparisons against the No Algae control  
827 condition): cw15 vs LMJ-040682 ( $p < 1e^{-10}$ ); LMJ-040682 vs LMJ-040682::pAS\_C2 ( $p < 1e^{-09}$ );  
828 and LMJ-040682 vs LMJ-040682::pAS\_C3 ( $p < 1e^{-09}$ ). Additionally, Tukey's test found  
829 the following strain to show a significant difference due to thiamine addition: LMJ-  
830 040682::pAS\_C3 ( $p < 1e^{-07}$ ).

831

832

833 **Figure 5. Confocal microscopy of complemented *C. reinhardtii* CrCBA1 knockout lines**

834 **showing an association between CrCBA1 and membranes.** LMJ-040682 and LMJ-  
835 040682::pAS\_C2 A10 and D10 lines were imaged according to the protocol outlined in the  
836 materials and methods. Channels shown (left to right) are brightfield, chlorophyll, mVenus  
837 and an overlay. Microscope settings are described in Methods.

838

839 **Figure 6. CBA1 expression and B<sub>12</sub> uptake capacity in a B<sub>12</sub>-dependent mutant of *C.***

840 **reinhardtii (metE7) during B<sub>12</sub> starvation and add-back.** a) CBA1 expression measured  
841 by RT-qPCR and expressed relative to the housekeeping gene RACK1 using the  $2^{-(\Delta\Delta Ct)}$   
842 method. Vertical dashed lines denote when B<sub>12</sub> was removed and added. b) B<sub>12</sub> uptake  
843 capacity of starved metE7 cells (expressed as  $10^6$  molecules of B<sub>12</sub> per cell over 1h) at the  
844 same 6 time points during B<sub>12</sub> starvation; it was not possible to perform the uptake assay on  
845 cells to which B<sub>12</sub> had already been added. Cell density measurements were performed by  
846 counting plated cells in dilution series, and so included non-viable cells. For CBA1  
847 expression and B<sub>12</sub> uptake, 3 and 6 biological replicates were used, respectively, with points  
848 representing means, and error bars representing standard deviations.

849

850

851 **Figure 7. Distribution of CBA1 and methionine synthase sequences across Eukaryotic**

852 **groups.** The EukProt database (Richter et al., 2022) was searched for METE, METH and  
853 CBA1 queries, as described in the materials and methods. Organisms were only considered if  
854 they contained at least one valid methionine synthase hit (METE or METH) and their  
855 genomes were >70% complete, as measured by BUSCO (Manni et al., 2021). Eukaryotic  
856 classes were filtered for those with greater than 5 genomes and the numbers of taxa for each  
857 class are indicated in brackets. The different combinations of CBA1, METE and METH were

858 calculated for each species (Supplementary Table 4) and summarised as a percentage of the  
859 total number of taxa in each class, with gradual shading to show the variation in distribution  
860 between the different classes.

861

862 **Figure 8. Identification and predicted structural location of CrCBA1 conserved**

863 **residues. a)** Sequences with similarity to CBA1 were identified from the EukProt database  
864 (Richter et al., 2022) using a manually generated CBA1 Hidden Markov Model (HMM), as  
865 described in the materials and methods. A selection of 18 taxa from several eukaryotic  
866 supergroups were chosen and conserved regions from the protein are presented. Specific  
867 residues indicated by \* are: K78, P118, L136, E206, F214, F215, N216, E218, P251, V253,  
868 W255, G289, W394, F395, E396 and D408. Protein sequences are coloured according to the  
869 Clustal colour-scheme using Geneious Prime 2021.1.1 ([www.geneious.com](http://www.geneious.com)). For each highly  
870 conserved region, the corresponding position and amino acid from the CrCBA1 sequence  
871 (Cre02.g081050) is indicated. **b)** The predicted 3D structure of CrCBA1 was assessed using  
872 the Phyre2 structural prediction server using the intensive mode settings (dark blue). Highly  
873 conserved regions of CrCBA1 are indicated in light blue and labelled. CrCBA1 was aligned  
874 to the crystal structure of *E. coli* BtuF in complex with B<sub>12</sub> (pdb: 1n2z). This enabled the  
875 relative position of B<sub>12</sub> (shown in red) to be superimposed onto CrCBA1.

876

877

878

Figure 1

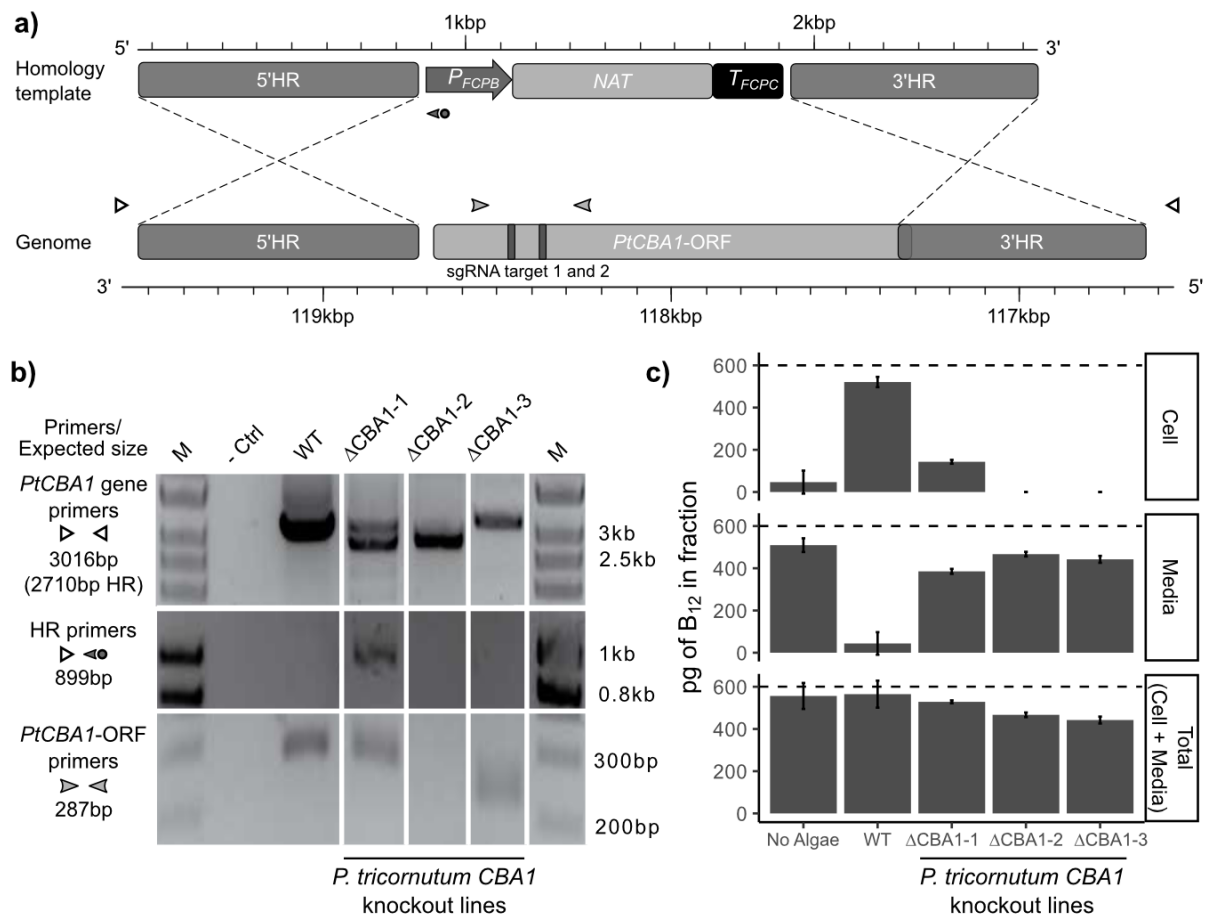

**Figure 1. Disruption of *Phaeodactylum tricornutum* CBA1 (*PtCBA1*) using CRISPR-Cas9 yielded lines with impaired  $B_{12}$  uptake.** **a)** Schematic showing CRISPR-Cas9 sgRNA target sites and the homology repair template design used to generate mutant lines in *PtCBA1* (Phatr3\_J48322). The homology repair template schematic is annotated with the 5' homology region (HR) and 3'HR, the *FCPB* promoter, nourseothricin resistance gene (*NAT*) and *FCPC* terminator. The *PtCBA1* gene is annotated with the ORF, the 5'HR and 3'HR regions used in the homology template and the regions of the ORF targeted by sgRNA (vertical bars). Primer positions used for the analysis of putative mutant lines are shown with arrowheads. **b)** PCR of regions across and within wild-type (WT) and mutant *PtCBA1* in 3 independent CRISPR-Cas9 lines ( $\Delta$ CBA1) showing indel mutations in the mutants. PCR products from different sets of primers indicated in panel a are shown. M = marker, - Ctrl = no DNA template. **c)** A  $B_{12}$  uptake assay was performed as described in Materials and Methods, to determine the amount of  $B_{12}$  in the media and the cells after 1h incubation of *P. tricornutum* cells in 600 pg  $B_{12}$ . The 'Total' was inferred by the addition of the cell and media fractions. The dashed line indicates the amount of  $B_{12}$  added to the experiment. Standard deviation error bars are shown, n=4. Statistical analysis was performed on the media fraction, and Tukey's test identified the following comparisons to be significantly different from one another: WT vs No Algae ( $p < 1e^{-12}$ ); WT vs  $\Delta$ CBA1-1 ( $p < 1e^{-10}$ ); WT vs  $\Delta$ CBA1-2 ( $p < 1e^{-12}$ ); WT vs  $\Delta$ CBA1-3 ( $p < 1e^{-11}$ ); No Algae vs  $\Delta$ CBA1-1 ( $p < 1e^{-03}$ ); No Algae vs  $\Delta$ CBA1-3 ( $p < 0.05$ ); and  $\Delta$ CBA1-1 vs  $\Delta$ CBA1-2 ( $p < 1e^{-02}$ ).

Figure 2

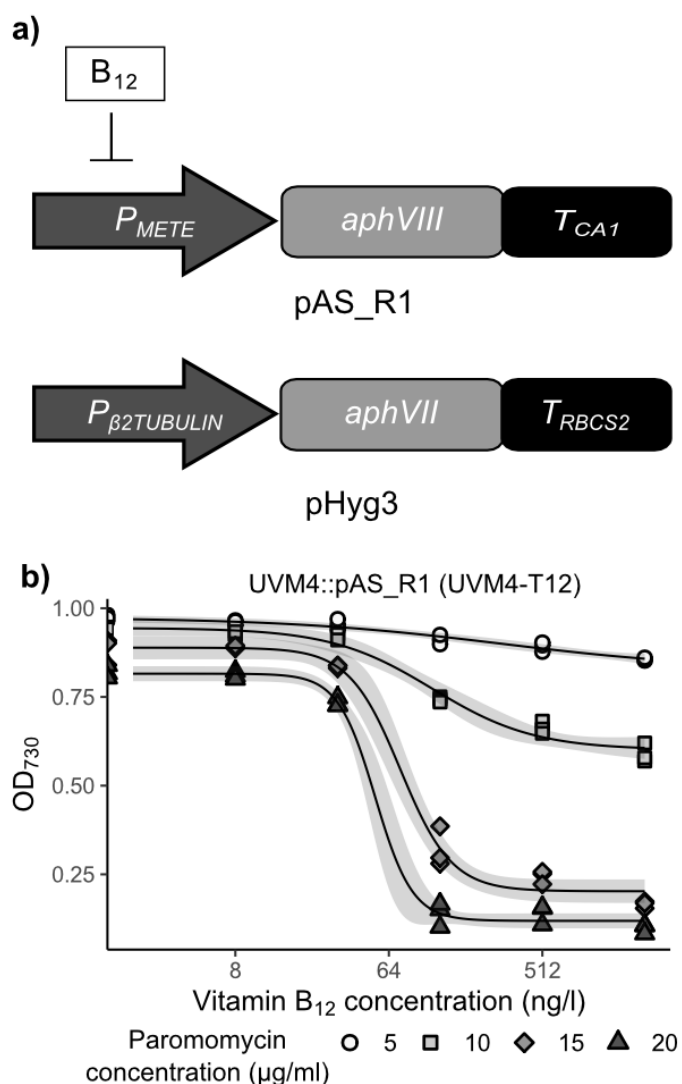

**Figure 2. Generation and use of *C. reinhardtii* reporter strain UVM4-T12 for insertional mutagenesis.** **a)** Schematic of the constructs used for insertional mutagenesis of *C. reinhardtii*. The pAS\_R1 construct was designed to control expression of the paromomycin resistance gene (*aphVIII*) via B<sub>12</sub> mediated repression of the *METE* promoter (*P<sub>METE</sub>*). The pHyg3 construct encoded a constitutively expressed hygromycin resistance gene (*aphVII*), to be used for insertional mutagenesis. **b)** Growth of *C. reinhardtii* B<sub>12</sub> reporter strain UVM4-T12 bearing pAS\_R1 plasmid, in response to vitamin B<sub>12</sub> and paromomycin concentration in the media according to the algal dose-response assay. The predicted dose-response model is shown in black, with 95% confidence intervals in grey.



Figure 3

bioRxiv preprint doi: <https://doi.org/10.1101/2023.03.24.534157>; this version posted March 25, 2023. The copyright holder for this preprint (which was not certified by peer review) is the author/funder, who has granted bioRxiv a license to display the preprint in perpetuity. It is made available under a [CC-BY-NC-ND 4.0 International license](https://creativecommons.org/licenses/by-nc-nd/4.0/).

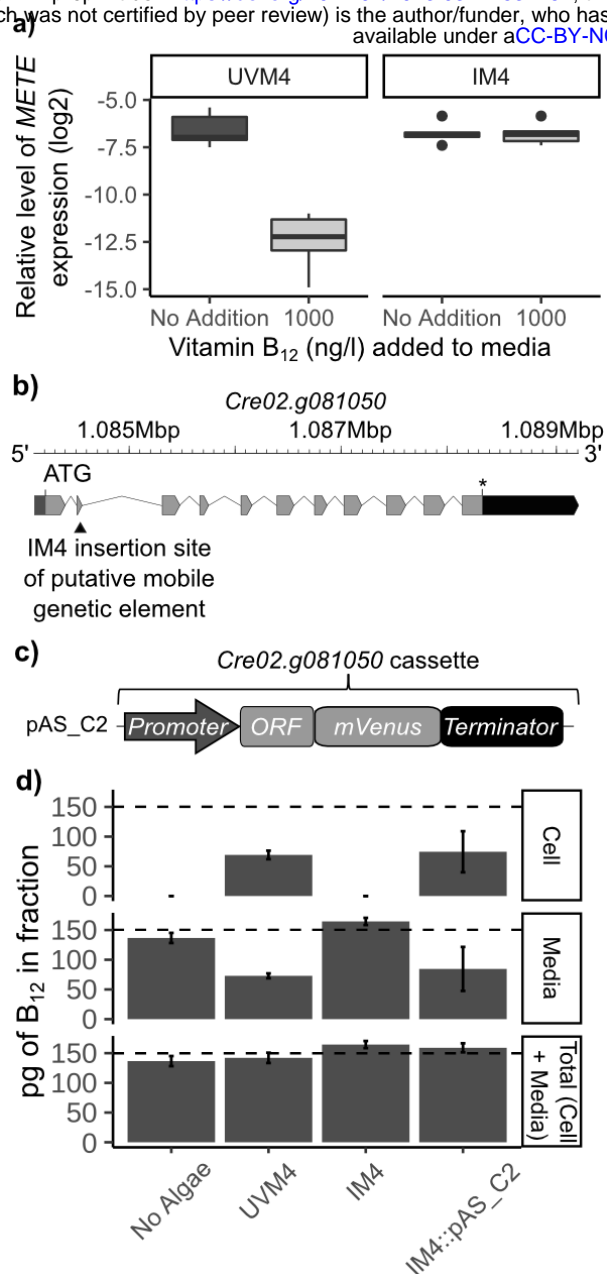

**Figure 3. *C. reinhardtii* insertional mutant IM4 is defective in B<sub>12</sub> response and uptake, and can be functionally complemented with *CrCBA1*.** **a)** Effect of vitamin B<sub>12</sub> on *METE* gene expression in UVM4 and IM4, determined by RT-qPCR. UVM4 and IM4 were grown in TAP media with or without 1000 ng·l<sup>-1</sup> vitamin B<sub>12</sub> for 4 days at 25°C, 120 rpm and in continuous light (90 μE·m<sup>-2</sup>·s<sup>-1</sup>). Boxplots of the log<sub>2</sub> transformed relative expression level of *METE* to the *RACK1* housekeeping gene are shown, n=6. Significant comparisons were identified using Tukey's test: UVM4 + 1000 ng·l<sup>-1</sup> vitamin B<sub>12</sub> from UVM4 No Addition ( $p < 1e^{-08}$ ), IM4 No Addition ( $p < 1e^{-08}$ ) and IM4 + 1000 ng·l<sup>-1</sup> vitamin B<sub>12</sub> ( $p < 1e^{-07}$ ). **b)** Schematic of the *Cre02.g081050* gene showing the position of the insertion site (indicated with a black triangle) determined by whole genome sequencing (Figure S4). **c)** Schematic of the *pAS\_C2* construct designed to express *CrCBA1* fused to the fluorescent reporter *mVenus*. *CrCBA1-mVenus* was under the control of the *CrCBA1* promoter and terminator. *pAS\_C2* also contained the spectinomycin resistance gene *aadA*, driven by the *PSAD* promoter and *PSAD* terminator. **d)** B<sub>12</sub>-uptake assay with UVM4, IM4 and IM4::pAS\_C2 (n =4 separate transformants with high *mVenus* expression). Dashed line indicates the amount of B<sub>12</sub> added to the assay. Standard deviation error bars are shown. Statistical analysis was performed on the media fraction, and Tukey's test identified the following comparisons to be significantly different from one another: No Algae vs UVM4 ( $p < 1e^{-05}$ ); No Algae vs IM4 ( $p < 0.05$ ); No Algae vs IM4::pAS\_C2 ( $p < 1e^{-03}$ ); UVM4 vs 1.G2 ( $p < 1e^{-09}$ ); and 1.G2 vs 1.G2::pAS\_C2 ( $p < 1e^{-06}$ ).

Figure 4

bioRxiv preprint doi: <https://doi.org/10.1101/2023.03.24.534157>; this version posted March 25, 2023. The copyright holder for this preprint (which was not certified by peer review) is the author/funder, who has granted bioRxiv a license to display the preprint in perpetuity. It is made available under aCC-BY-NC-ND 4.0 International license.

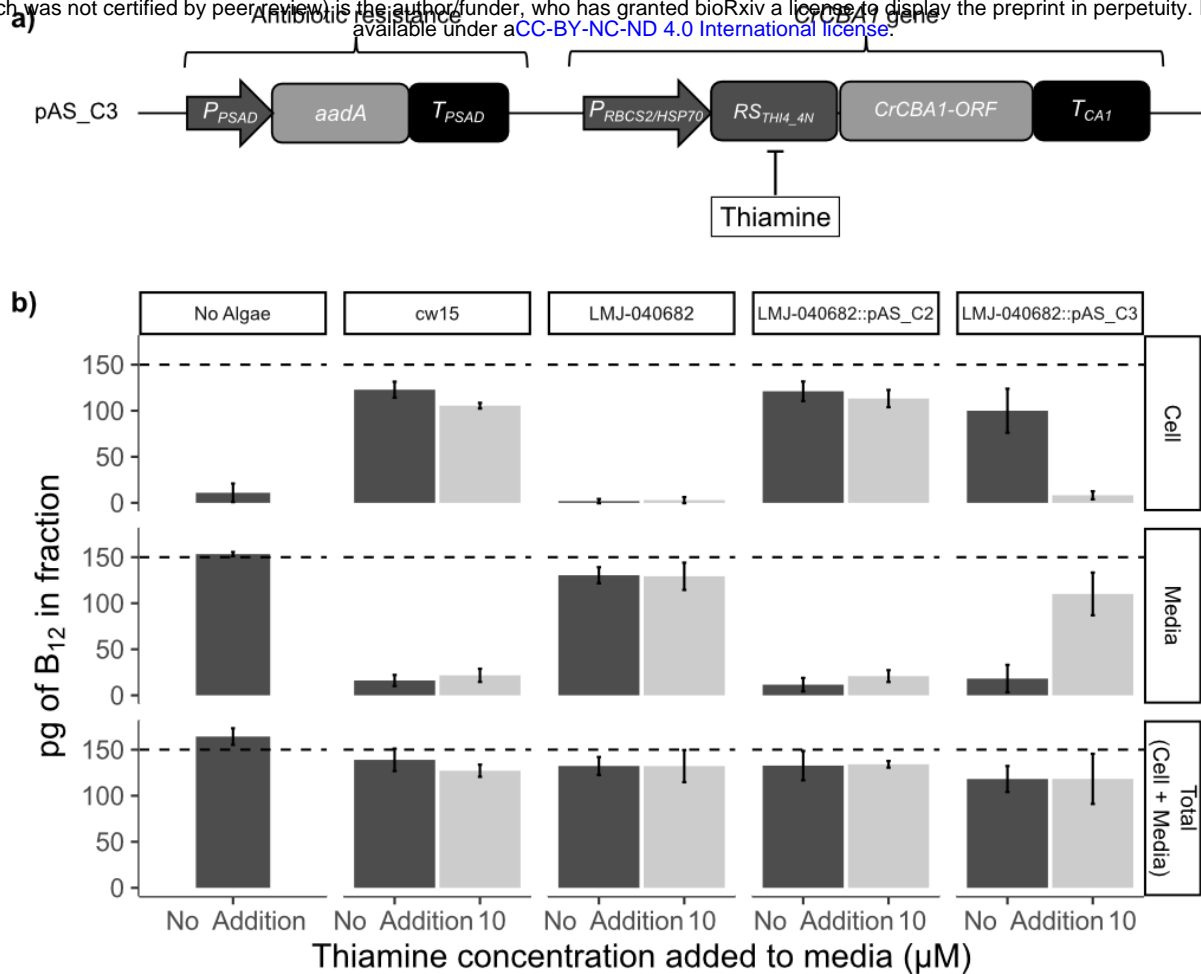

**Figure 4. CLiP mutants in CrCBA1 are impaired in their ability to take up B<sub>12</sub>. a)**

Schematic of the pAS\_C3 construct designed to express *CrCBA1* in a controllable manner using a thiamine repressible riboswitch ( $RS_{THI4\_4N}$ ) to allow repression of *CrCBA1* through the addition of thiamine (Mehrshahi et al., 2020). **b)** B<sub>12</sub>-uptake assay with cw15, LMJ-040682 and mean of 3 independent transformants of LMJ-040682::pAS\_C2 and LMJ-040682::pAS\_C3. The growth conditions were modified compared to previous assays: lines were grown with or without 10 μM thiamine supplementation for 5 days in a 16/8 light/dark cycle, and 8 hours after the dark to light transition the cultures were used for the algal B<sub>12</sub>-uptake assay. The dashed line indicates the amount of B<sub>12</sub> added to the sample. Standard deviation error bars are shown. Statistical analysis was performed on the media fraction. Tukey's test identified the following algal strains to be significantly different from one another in media without thiamine (not reporting comparisons against the No Algae control condition): cw15 vs LMJ-040682 ( $p < 1e^{-10}$ ); LMJ-040682 vs LMJ-040682::pAS\_C2 ( $p < 1e^{-09}$ ); and LMJ-040682 vs LMJ-040682::pAS\_C3 ( $p < 1e^{-09}$ ). Additionally, Tukey's test found the following strain to show a significant difference due to thiamine addition: LMJ-040682::pAS\_C3 ( $p < 1e^{-07}$ ).



Figure 5

bioRxiv preprint doi: <https://doi.org/10.1101/2023.03.24.534157>; this version posted March 25, 2023. The copyright holder for this preprint (which was not certified by peer review) is the author/funder, who has granted bioRxiv a license to display the preprint in perpetuity. It is made available under aCC-BY-NC-ND 4.0 International license.

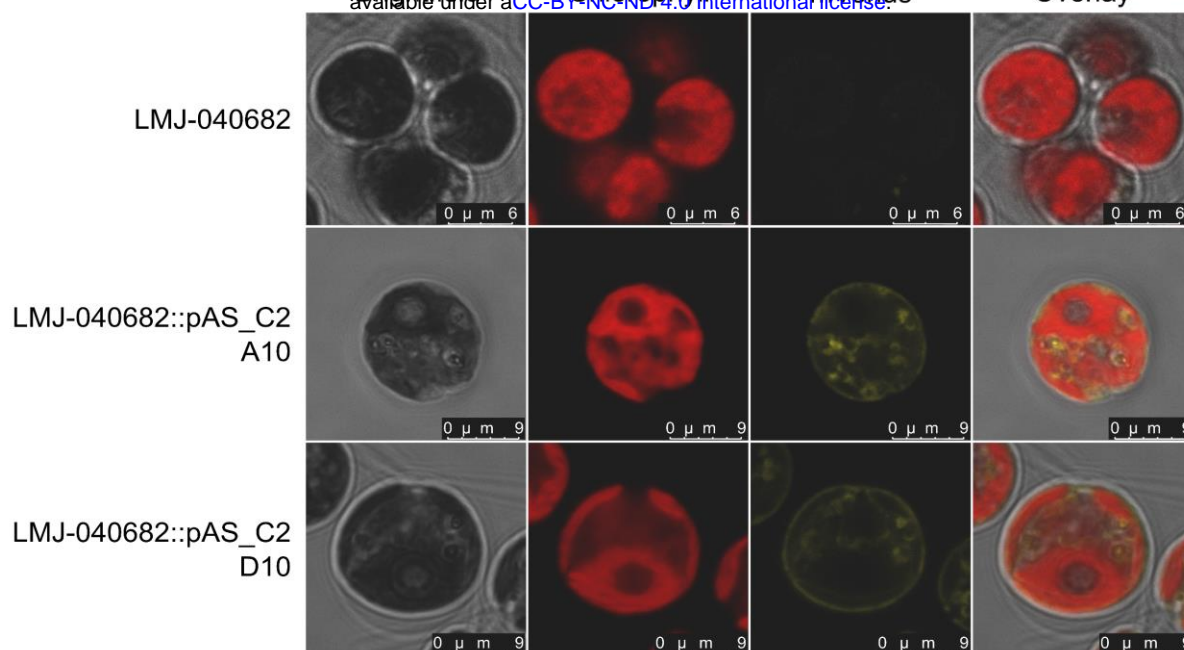

**Figure 5. Confocal microscopy of complemented *C. reinhardtii* CrCBA1 knockout lines showing an association between CrCBA1 and membranes.** LMJ-040682 and LMJ-040682::pAS\_C2 A10 and D10 lines were imaged according to the protocol outlined in the materials and methods. Channels shown (left to right) are brightfield, chlorophyll, mVenus and an overlay. Microscope settings are described in Methods.

Figure 6

bioRxiv preprint doi: <https://doi.org/10.1101/2023.03.24.534157>; this version posted March 25, 2023. The copyright holder for this preprint (which was not certified by peer review) is the author/funder, who has granted bioRxiv a license to display the preprint in perpetuity. It is made available under a [CC-BY-NC-ND 4.0 International license](#).

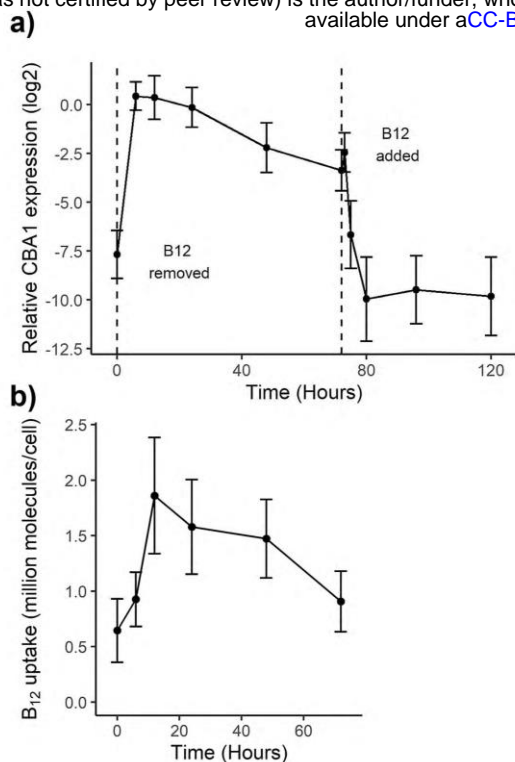

**Figure 6. CBA1 expression and B<sub>12</sub> uptake capacity in a B<sub>12</sub>-dependent mutant of *C. reinhardtii* (*metE7*) during B<sub>12</sub> starvation and add-back.** a) CBA1 expression measured by RT-qPCR and expressed relative to the housekeeping gene RACK1 using the 2<sup>-(ΔCt)</sup> method. Vertical dashed lines denote when B<sub>12</sub> was removed and added. b) B<sub>12</sub> uptake capacity of starved *metE7* cells (expressed as 10<sup>6</sup> molecules of B<sub>12</sub> per cell over 1h) at the same 6 time points during B<sub>12</sub> starvation; it was not possible to perform the uptake assay on cells to which B<sub>12</sub> had already been added. Cell density measurements were performed by counting plated cells in dilution series, and so included non-viable cells. For CBA1 expression and B<sub>12</sub> uptake, 3 and 6 biological replicates were used, respectively, with points representing means, and error bars representing standard deviations.

Figure 7

bioRxiv preprint doi: <https://doi.org/10.1101/2023.03.24.534157>; this version posted March 25, 2023. The copyright holder for this preprint (which was not certified by peer review) is the author/funder, who has granted bioRxiv a license to display the preprint in perpetuity. It is made available under aCC-BY-NC-ND 4.0 International license.

| Class (no. of taxa)   |         | % with METH | % with METH+METE | % with METE |
|-----------------------|---------|-------------|------------------|-------------|
| Chlorophyta (18)      | CBA1    | 61          | 17               | 0           |
|                       | No CBA1 | 11          | 6                | 6           |
| Stramenopiles (48)    | CBA1    | 48          | 17               | 2           |
|                       | No CBA1 | 4           | 21               | 8           |
| Alveolata (11)        | CBA1    | 45          | 0                | 0           |
|                       | No CBA1 | 45          | 0                | 9           |
| Rhizaria (9)          | CBA1    | 67          | 0                | 0           |
|                       | No CBA1 | 11          | 22               | 0           |
| Streptophyta (22)     | CBA1    | 0           | 5                | 73          |
|                       | No CBA1 | 0           | 0                | 23          |
| Amoebozoa (13)        | CBA1    | 0           | 8                | 0           |
|                       | No CBA1 | 31          | 62               | 0           |
| Choanoflagellata (22) | CBA1    | 23          | 0                | 0           |
|                       | No CBA1 | 77          | 0                | 0           |
| Metazoa (42)          | CBA1    | 0           | 0                | 0           |
|                       | No CBA1 | 83          | 12               | 5           |
| Fungi (27)            | CBA1    | 0           | 19               | 7           |
|                       | No CBA1 | 0           | 4                | 70          |

**Figure 7. Distribution of CBA1 and methionine synthase sequences across Eukaryotic groups.** The EukProt database (Richter et al., 2022) was searched for METE, METH and CBA1 queries, as described in the materials and methods. Organisms were only considered if they contained at least one valid methionine synthase hit (METE or METH) and their genomes were >70% complete, as measured by BUSCO (Manni et al., 2021). Eukaryotic classes were filtered for those with greater than 5 genomes and the numbers of taxa for each class are indicated in brackets. The different combinations of CBA1, METE and METH were calculated for each species (Supplementary Table 4) and summarised as a percentage of the total number of taxa in each class, with gradual shading to show the variation in distribution between the different classes.

Figure 8

bioRxiv preprint doi: <https://doi.org/10.1101/2023.03.24.534157>; this version posted March 25, 2023. The copyright holder for this preprint (which was not certified by peer review) is the author/funder, who has granted bioRxiv a license to display the preprint in perpetuity. It is made available under aCC-BY-NC-ND 4.0 International license.

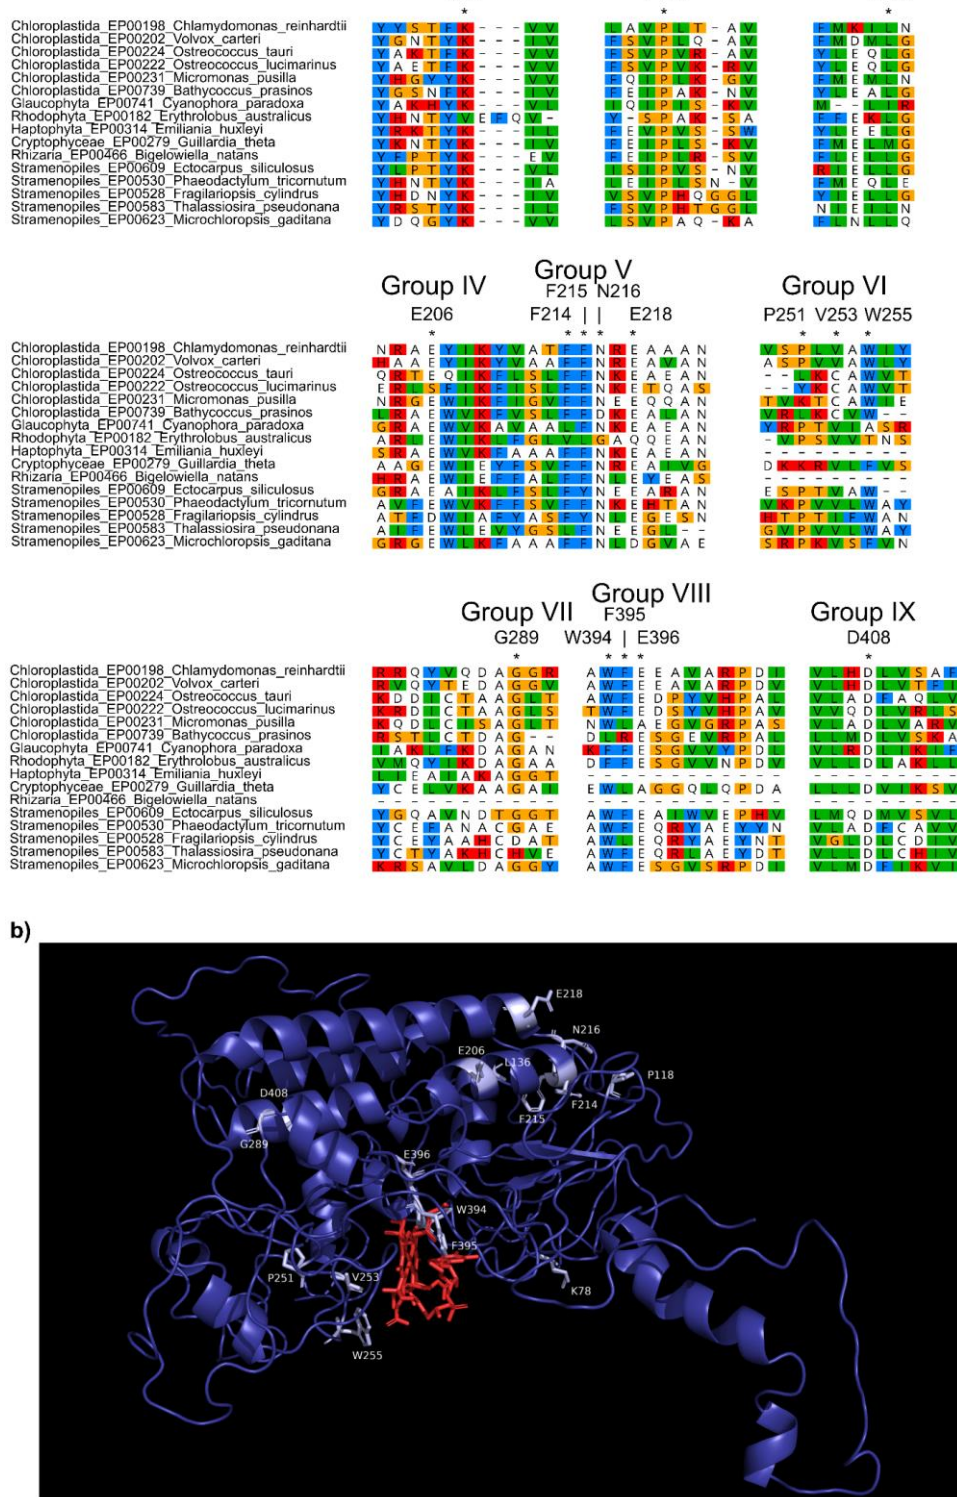

**Figure 8. Identification and predicted structural location of CrCBA1 conserved residues. a)**

Sequences with similarity to CBA1 were identified from the EukProt database (Richter et al., 2022) using a manually generated CBA1 Hidden Markov Model (HMM), as described in the materials and methods. A selection of 18 taxa from several eukaryotic supergroups were chosen and conserved regions from the protein are presented. Specific residues indicated by \* are: K78, P118, L136, E206, F214, F215, N216, E218, P251, V253, W255, G289, W394, F395, E396 and D408. Protein sequences are coloured according to the Clustal colour-scheme using Geneious Prime 2021.1.1 ([www.geneious.com](http://www.geneious.com)). For each highly conserved region, the corresponding position and amino acid from the CrCBA1 sequence (Cre02.g081050) is indicated. **b)** The predicted 3D structure of CrCBA1 was assessed using the Phyre2 structural prediction server using the intensive mode settings (dark blue). Highly conserved regions of CrCBA1 are indicated in light blue and labelled. CrCBA1 was aligned to the crystal structure of *E. coli* BtuF in complex with B<sub>12</sub> (pdb: 1n2z). This enabled the relative position of B<sub>12</sub> (shown in red) to be superimposed onto CrCBA1.



## Parsed Citations

- Allen, MD, del Campo JA, Kropat J, Merchant SS (2007) FEA1, FEA2, and FRE1, encoding two homologous secreted proteins and a candidate ferrereductase, are expressed coordinately with FOX1 and FTR1 in iron-deficient Chlamydomonas reinhardtii. Eukaryotic Cell 6: 1841–1852**  
Google Scholar: [Author Only](#) [Title Only](#) [Author and Title](#)
- Almagro Armenteros J, Sønderby CK, Sønderby SK, Nielsen H, Winther O (2017) DeepLoc: Prediction of protein subcellular localization using deep learning. Bioinformatics 33: 3387–3395**  
Google Scholar: [Author Only](#) [Title Only](#) [Author and Title](#)
- Almagro Armenteros J, Tsirigos KD, Sønderby CK, Petersen TN, Winther O, Brunak S, Heijne G von, Nielsen H (2019) SignalP 5.0 improves signal peptide predictions using deep neural networks. Nature Biotechnology 37: 420–423**  
Google Scholar: [Author Only](#) [Title Only](#) [Author and Title](#)
- Banerjee R, Gouda H, Pillay S (2021) Redox-linked coordination chemistry directs vitamin B12 trafficking. Accounts of Chemical Research 54: 2003–2013**  
Google Scholar: [Author Only](#) [Title Only](#) [Author and Title](#)
- Beedholm-Ebsen R, Wetering KVD, Hardlei T, Nexø E, Borst P, Søren K, Moestrup SK (2010) Identification of multidrug resistance protein 1 (MRP1/ABCC1) as a molecular gate for cellular export of cobalamin. Blood 115: 1632–1639**  
Google Scholar: [Author Only](#) [Title Only](#) [Author and Title](#)
- Bertrand EM, Saito MA, Rose JM, Riesselman CR, Lohan MC, Noble AE, Lee PA, DiTullio GR (2011) Vitamin B12 and iron colimitation of phytoplankton growth in the Ross Sea. Limnol Oceanogr 52: 1079-1093**  
Google Scholar: [Author Only](#) [Title Only](#) [Author and Title](#)
- Bertrand EM, Allen AE, Dupont CL, Norden-Krichmar TM, Bai J, Valas RE, Saito MA (2012) Influence of cobalamin scarcity on diatom molecular physiology and identification of a cobalamin acquisition protein. Proc Natl Acad Sci U S A 109: E1762–71**  
Google Scholar: [Author Only](#) [Title Only](#) [Author and Title](#)
- Borths EL, Locher KP, Lee AT, Rees DC (2002) The structure of Escherichia coli BtuF and binding to its cognate ATP binding cassette transporter. Proc Natl Acad Sci U S A 99: 16642–7**  
Google Scholar: [Author Only](#) [Title Only](#) [Author and Title](#)
- Bunbury F, Helliwell KE, Mehrshahi P, Davey MP, Salmon DL, Holzer A, Smirnov N, Smith AG (2020) Responses of a newly evolved auxotroph of Chlamydomonas to B12 deprivation. Plant Physiology 183: 167–178**  
Google Scholar: [Author Only](#) [Title Only](#) [Author and Title](#)
- Bykov YS, Schaffer M, Dodonova SO, Albert S, Plietzko JM, Baumeister W, Engel BD, Briggs JA (2017) The structure of the COPI coat determined within the cell. eLife 6: e32493**  
Google Scholar: [Author Only](#) [Title Only](#) [Author and Title](#)
- Carlucci FA, Silbernagel BS, McNally MP (2007) The influence of temperature and solar radiation on persistence of vitamin B12, thiamine, and biotin in seawater. Journal of Phycology 5: 302–305**  
Google Scholar: [Author Only](#) [Title Only](#) [Author and Title](#)
- Choi CC, Ford RC (2021) ATP binding cassette importers in eukaryotic organisms. Biological Reviews 96: 1318–1330**  
Google Scholar: [Author Only](#) [Title Only](#) [Author and Title](#)
- Coelho D, Kim JC, Miousse IR, Fung S, Moulin M du, Buers I, Suormala T, Burda P, Frapolli M, Stucki M, et al (2012) Mutations in ABCD4 cause a new inborn error of vitamin B12 metabolism. Nature Genetics 44: 1152–1155**  
Google Scholar: [Author Only](#) [Title Only](#) [Author and Title](#)
- Craig RJ, Hasan AR, Ness RW, Keightley PD (2021) Comparative genomics of Chlamydomonas. Plant Cell 33:1016-1041**  
Google Scholar: [Author Only](#) [Title Only](#) [Author and Title](#)
- Croft MT, Lawrence AD, Raux-Deery E, Warren MJ, Smith AG (2005) Algae acquire vitamin B12 through a symbiotic relationship with bacteria. Nature 438: 90–3**  
Google Scholar: [Author Only](#) [Title Only](#) [Author and Title](#)
- Crozet P, Navarro FJ, Willmund F, Mehrshahi P, Bakowski K, Lauersen KJ, Pérez-Pérez M-E, Auroy P, Gorchs Rovira A, Sauret-Gueto S, et al (2018) Birth of a photosynthetic chassis: A MoClo toolkit enabling synthetic biology in the microalga Chlamydomonas reinhardtii. ACS Synthetic Biology 7: 2074–2086**  
Google Scholar: [Author Only](#) [Title Only](#) [Author and Title](#)
- Denning GM, Fulton AB (1989) Purification and characterization of clathrin-coated vesicles from Chlamydomonas. The Journal of Protozoology 36: 334–340**  
Google Scholar: [Author Only](#) [Title Only](#) [Author and Title](#)

**Droop MR (1968) Vitamin B12 and marine ecology. IV. The kinetics of uptake, growth and inhibition in *Monochrysis lutheri*. *Journal of the Marine Biological Association of the United Kingdom* 48: 689–733**

Google Scholar: [Author Only](#) [Title Only](#) [Author and Title](#)

**Field CB, Behrenfeld MJ, Randerson JT, Falkowski P (1998) Primary production of the biosphere: Integrating terrestrial and oceanic components. *Science* 281: 237–240**

Google Scholar: [Author Only](#) [Title Only](#) [Author and Title](#)

**Gonzalez JC, Banerjee RV, Huang S, Sumner JS, Matthews RG (1992) Comparison of cobalamin-independent and cobalamin-dependent methionine synthases from *Escherichia coli*: Two solutions to the same chemical problem. *Biochemistry* 31: 6045–6056**

Google Scholar: [Author Only](#) [Title Only](#) [Author and Title](#)

**Goold HD, Cuiné S, Légeret B, Liang Y, Brugière S, Auroy P, Javot H, Tardif M, Jones B, Beisson F, et al (2016) Saturating light induces sustained accumulation of oil in plastidal lipid droplets in *Chlamydomonas reinhardtii*. *Plant Physiology* 171: 2406–2417**

Google Scholar: [Author Only](#) [Title Only](#) [Author and Title](#)

**Hanson AD, Roje S (2001) One-Carbon metabolism in higher plants. *Ann Rev Plant Physiol* 52: 119-137**

Google Scholar: [Author Only](#) [Title Only](#) [Author and Title](#)

**Helliwell KE, Collins S, Kazamia E, Purton S, Wheeler GL, Smith AG (2015) Fundamental shift in vitamin B12 eco-physiology of a model alga demonstrated by experimental evolution. *ISME J* 9: 1446–1455**

Google Scholar: [Author Only](#) [Title Only](#) [Author and Title](#)

**Helliwell KE, Scaife MA, Sasso S, Araujo APU, Purton S, Smith AG (2014) Unraveling vitamin B12-responsive gene regulation in algae. *Plant Physiol* 165: 388–397**

Google Scholar: [Author Only](#) [Title Only](#) [Author and Title](#)

**Helliwell KE, Wheeler GL, Leptos KC, Goldstein RE, Smith AG (2011) Insights into the evolution of vitamin B12 auxotrophy from sequenced algal genomes. *Molecular Biology and Evolution* 28: 2921–2933**

Google Scholar: [Author Only](#) [Title Only](#) [Author and Title](#)

**Hopes A, Nekrasov V, Belshaw N, Grouneva I, Kamoun S, Mock T (2017) Genome editing in diatoms using CRISPR-cas to induce precise bi-allelic deletions. *Bio Protoc* 7: e2625**

Google Scholar: [Author Only](#) [Title Only](#) [Author and Title](#)

**Joglar V, Pontiller B, Martínez-García S, Fuentes-Lema A, Pérez-Lorenzo M, Lundin D, Pinhassi J Fernández E, Teira E (2021) Microbial plankton community structure and function responses to vitamin B12 and B1 amendments in an upwelling system. *Appl Environ Microbiol* 87: e0152521.**

Google Scholar: [Author Only](#) [Title Only](#) [Author and Title](#)

**Kadner RJ (1990) Vitamin B12 transport in *Escherichia coli*: Energy coupling between membranes. *Molecular Microbiology* 4: 2027–2033**

Google Scholar: [Author Only](#) [Title Only](#) [Author and Title](#)

**Katoh K, Standley DM (2013) MAFFT multiple sequence alignment software version 7: Improvements in performance and usability. *Molecular Biology and Evolution* 30: 772–780**

Google Scholar: [Author Only](#) [Title Only](#) [Author and Title](#)

**Kelley LA, Mezulis S, Yates CM, Wass MN, Sternberg MJE (2015) The Phyre2 web portal for protein modeling, prediction and analysis. *Nat Protoc* 10: 845–58**

Google Scholar: [Author Only](#) [Title Only](#) [Author and Title](#)

**King N, Westbrook MJ, Young SL, Kuo A, Abedin M, Chapman J, et al. (2008). The genome of the choanoflagellate *Monosiga brevicollis* and the origin of metazoans. *Nature*. 451: 783–788.**

Google Scholar: [Author Only](#) [Title Only](#) [Author and Title](#)

**Koch F, Hattenrath-Lehmann TK, Goleski JA, Sañudo-Wilhelmy S, Fisher NS, Gobler CJ. 2012. Vitamin B1 and B12 uptake and cycling by plankton communities in coastal ecosystems. *Front Microbiol* 3:363.**

Google Scholar: [Author Only](#) [Title Only](#) [Author and Title](#)

**Lawrence AD, Nemoto-Smith E, Deery E, Baker JA, Schroeder S, Brown DG, Tullet JMA, Howard MJ, Brown IR, Smith AG, et al (2018) Construction of fluorescent analogs to follow the uptake and distribution of cobalamin (vitamin B12) in bacteria, worms, and plants. *Cell Chem Biol* 25: 941–951**

Google Scholar: [Author Only](#) [Title Only](#) [Author and Title](#)

**Li X, Zhang R, Patena W, Gang SS, Blum SR, Ivanova N, Yue R, Robertson JM, Lefebvre PA, Fitz-Gibbon ST, et al (2016) An indexed, mapped mutant library enables reverse genetics studies of biological processes in *Chlamydomonas reinhardtii*. *Plant Cell* 28: 367–87**

Google Scholar: [Author Only](#) [Title Only](#) [Author and Title](#)

**Mackinder LCM, Chen C, Leib RD, Patena W, Blum SR, Rodman M, Ramundo S, Adams CM, Jonikas MC (2017) A spatial interactome reveals the protein organization of the algal CO<sub>2</sub> concentrating mechanism. *Cell* 171: 133–147.e14**

Google Scholar: [Author Only](#) [Title Only](#) [Author and Title](#)

**Manni M, Berkeley MR, Seppey M, Simão FA, Zdobnov EM (2021) BUSCO update: Novel and streamlined workflows along with broader and deeper phylogenetic coverage for scoring of eukaryotic, prokaryotic, and viral genomes. *Molecular Biology and Evolution* 38: 4647–4654**

Google Scholar: [Author Only](#) [Title Only](#) [Author and Title](#)

**Mehrshahi P, Nguyen GTDT, Gorchs Rovira A, Sayer A, Llaveró-Pasquina M, Lim Huei Sin M, Medcalf EJ, Mendoza-Ochoa GI, Scaife MA, Smith AG (2020) Development of novel riboswitches for synthetic biology in the green alga *Chlamydomonas*. *ACS Synthetic Biology* 9: 1406–1417**

Google Scholar: [Author Only](#) [Title Only](#) [Author and Title](#)

**Mentch SJ, Locasale JW (2016) One-carbon metabolism and epigenetics: understanding the specificity *Ann NY Acad Sci* 1363: 91-8**

Google Scholar: [Author Only](#) [Title Only](#) [Author and Title](#)

**Mitchell AL, Attwood TK, Babbitt PC, Blum M, Bork P, Bridge A, Brown SD, Chang H-Y, El-Gebali S, Fraser MI et al. (2019) InterPro in 2019: improving coverage, classification and access to protein sequence annotations. *Nucl Acids Res* 47: D351–D360**

Google Scholar: [Author Only](#) [Title Only](#) [Author and Title](#)

**Neupert J, Karcher D, Bock R (2009) Generation of *Chlamydomonas* strains that efficiently express nuclear transgenes. *The Plant Journal* 57: 1140–1150**

Google Scholar: [Author Only](#) [Title Only](#) [Author and Title](#)

**Nielsen MJ, Rasmussen MR, Andersen CBF, Nexø E, Moestrup SK (2012) Vitamin B12 transport from food to the body's cells—a sophisticated, multistep pathway. *Nature Reviews Gastroenterology & Hepatology* 9: 345–354**

Google Scholar: [Author Only](#) [Title Only](#) [Author and Title](#)

**Ohwada K (1973) Seasonal cycles of vitamin B12, thiamine and biotin in Lake Sagami. Patterns of their distribution and ecological significance. *Internationale Revue der gesamten Hydrobiologie und Hydrographie* 58: 851–871**

Google Scholar: [Author Only](#) [Title Only](#) [Author and Title](#)

**Orłowska M, Steczkiewicz K, Muszewska A (2021) Utilization of cobalamin is ubiquitous in early-branching fungal phyla. *Genome Biology and Evolution* 13: evab043**

Google Scholar: [Author Only](#) [Title Only](#) [Author and Title](#)

**Panzeca C, Beck AJ, Tovar-Sanchez A, Segovia-Zavala J, Taylor GT, Gobler CJ, Sañudo-Wilhelmy SA (2009) Distributions of dissolved vitamin B12 and Co in coastal and open-ocean environments. *Estuarine, Coastal and Shelf Science* 85: 223–230**

Google Scholar: [Author Only](#) [Title Only](#) [Author and Title](#)

**Pintner IJ, Altmeyer VL (1979) Vitamin B12-binder and other algal inhibitors *Journal of Phycology* 15: 391–398**

**Richter DJ, Berney C, Strasser JFH, Poh Y-P, Herman EK, Muñoz-Gómez SA, Wideman JG, Burki F, Vargas C de (2022) EukProt: A database of genome-scale predicted proteins across the diversity of eukaryotes. *Peer Community Journal* 2: e56**

Google Scholar: [Author Only](#) [Title Only](#) [Author and Title](#)

**Ritz C, Baty F, Streibig JC, Gerhard D (2015) Dose-response analysis using R. *PLoS One* 10: e0146021**

Google Scholar: [Author Only](#) [Title Only](#) [Author and Title](#)

**Rutsch F, Gailus S, Miousse IR, Suormala T, Sagné C, Toliat MR, Nürnberg G, Wittkamp T, Buers I, Sharifi A, et al (2009) Identification of a putative lysosomal cobalamin exporter altered in the cbIF defect of vitamin B12 metabolism. *Nature Genetics* 41: 234–239**

Google Scholar: [Author Only](#) [Title Only](#) [Author and Title](#)

**Sahni MK, Spanos S, Wahrman MZ, Sharma GM (2001) Marine corrinoid-binding proteins for the direct determination of vitamin B12 by radioassay. *Analytical Biochemistry* 289: 68–76**

Google Scholar: [Author Only](#) [Title Only](#) [Author and Title](#)

**Sañudo-Wilhelmy SA, Gómez-Consarnau L, Suffridge C, Webb EA (2014) The role of B vitamins in marine biogeochemistry. *Annual Review of Marine Science* 6: 339–367**

Google Scholar: [Author Only](#) [Title Only](#) [Author and Title](#)

**Shelton AN, Seth EC, Mok KC, Han AW, Jackson SN, Haft DR, Taga ME (2019) Uneven distribution of cobamide biosynthesis and dependence in bacteria predicted by comparative genomics. *The ISME Journal* 13: 789–804**

Google Scholar: [Author Only](#) [Title Only](#) [Author and Title](#)

**Tang YZ, Koch F, Gobler CJ (2010) Most harmful algal bloom species are vitamin B1 and B12 auxotrophs. *Proc Natl Acad Sci U S A* 107: 20756–61**

Google Scholar: [Author Only](#) [Title Only](#) [Author and Title](#)

**Warren MJ, Raux E, Schubert HL, Escalante-Semerena JC (2002) The biosynthesis of adenosylcobalamin (vitamin B12). Natural product reports 19: 390–412**

Google Scholar: [Author Only](#) [Title Only](#) [Author and Title](#)

**Xie B, Bishop S, Stessman D, Wright D, Spalding MH, Halverson LJ (2013) Chlamydomonas reinhardtii thermal tolerance enhancement mediated by a mutualistic interaction with vitamin B12-producing bacteria. ISME J 7: 1544–55**

Google Scholar: [Author Only](#) [Title Only](#) [Author and Title](#)

**Yu Z, Geisler K, Leontidou T, Young REB, Vonlanthen SE, Purton S, Abell C, Smith AG (2021) Droplet-based microfluidic screening and sorting of microalgal populations for strain engineering applications. Algal Res 56: 102293**

Google Scholar: [Author Only](#) [Title Only](#) [Author and Title](#)
